1 **Authors:**

2 Taro Kimura<sup>a</sup>, Tomoko Tsuchida-Mayama<sup>b</sup>, Hirotatsu Imai<sup>a, c</sup>, Koji Okajima<sup>d</sup>,

3 Kosuke Ito<sup>a</sup>, Tatsuya Sakai<sup>a</sup>

4 <sup>a</sup>Graduate School of Science and Technology, Niigata University, Niigata-shi,

5 Niigata, 950-2181, Japan

6 <sup>b</sup>RIKEN Plant Science Center, RIKEN Plant Science Center, Yokohama,

7 Kanagawa 230-0045, Japan

8 <sup>c</sup>Research Fellow of Japan Society for the Promotion of Science, Kojimachi

9 Business Center Building, Chiyoda-ku, Tokyo 102-0083, Japan

10 <sup>d</sup>Department of Physics, Keio University, 3-14-1, Hiyoshi, Kouhoku-ku,

11 Yokohama, Kanagawa 223-8522, Japan

12

13 **Corresponding author:** Tatsuya Sakai

14 **e-mail:** tsakai@gs.niigata-u.ac.jp

15

16 **Title:** Arabidopsis ROOT PHOTOTROPISM2 is a Light-Dependent

17 Dynamic Modulator of Phototropin1

18

19 **Short title:** Action mechanism of RPT2 in phototropism

20

21 The author for distribution of materials integral to the findings presented in this

22 article in accordance with the policy described in the Instructions for Authors

23 ([www.plantcell.org](http://www.plantcell.org)) is Tatsuya Sakai ([tsakai@gs.niigata-u.ac.jp](mailto:tsakai@gs.niigata-u.ac.jp)).

24

25 **ABSTRACT**

26

27 *Arabidopsis thaliana* phototropin1 (phot1) is a blue-light photoreceptor, i.e. a  
28 blue-light-activated Ser/Thr-protein kinase that mediates various light responses  
29 including phototropism. Phot1 functions in hypocotyl phototropism dependent on  
30 the light induction of ROOT PHOTOTROPISM2 (RPT2) proteins within a broad  
31 range of blue light intensities. It is not yet known however how RPT2 contributes  
32 to the photosensory adaptation of phot1 to high intensity blue light and the  
33 second positive phototropism. We here show that RPT2 suppresses the activity  
34 of phot1. Yeast two-hybrid analysis indicated RPT2 binding to the LOV1 (light,  
35 oxygen or voltage sensing 1) domain of phot1 required for its high  
36 photosensitivity. Our biochemical analyses revealed that RPT2 inhibits the  
37 autophosphorylation of phot1, suggesting that it suppresses the photosensitivity  
38 and/or kinase activity of phot1 through the inhibition of LOV1 function. We found  
39 for the first time that RPT2 proteins are degraded via a ubiquitin-proteasome  
40 pathway when phot1 is inactive and stabilized under blue-light conditions in a  
41 phot1-dependent manner. We propose that RPT2 is a molecular rheostat that  
42 maintains a moderate activation level of phot1 under any light intensity  
43 conditions.

44

## 45 INTRODUCTION

46 Plant life is strongly dependent on light and the angiosperm *Arabidopsis thaliana*  
47 uses several kinds of photoreceptors to effectively adapt to various light  
48 conditions, including phytochromes (phys) which are red-/far-red-light  
49 photoreceptors, cryptochromes (crys), phototropins (phot), the LOV (light,  
50 oxygen or voltage sensing)/F-box/Kelch-domain proteins (ZTL, FKF1, and  
51 LKP2), which are blue-light photoreceptors, and a UV photoreceptor UVR8 (de  
52 Wit et al., 2016). In the case of the phy and cry families, phyA and cry2 are highly  
53 expressed in *Arabidopsis* seedlings under dark conditions and become unstable  
54 under bright light conditions, thus contributing strongly to the responses to weak  
55 and not bright light conditions. (Clough and Vierstra, 1997; Lin et al., 1998;  
56 Sharrock and Clack, 2002; Casal et al., 2014). On the other hand, phyB and cry1  
57 are stable and function as major photoreceptors under bright light conditions (Lin  
58 et al., 1998; Li et al., 2011). Plants therefore use different photoreceptor families  
59 and members of these families to recognize light quality and quantity in order to  
60 adapt to their various light environments.

61 In the case of the phot family, the highly photosensitive photoreceptor  
62 phot1 and the less photosensitive photoreceptor phot2 function redundantly in a  
63 fluence-rate dependent manner (Sakai et al., 2001). The phot1s have LOV1 and  
64 LOV2 domains in their N-terminal portions, and a serine/threonine (Ser/Thr)  
65 kinase domain belonging to the AGC (for cAMP-dependent protein kinase A,  
66 cGMP-dependent protein kinase G, and phospholipid-dependent protein kinase

67 C) VIII kinase domain, within their C-terminal half (Christie, 2007; Rademacher  
68 and Offringa., 2012). The phot2 localize on the inner surface of the plasma  
69 membrane, show autophosphorylation activities under blue-light conditions, and  
70 mediate blue-light responses such as phototropism, chloroplast photorelocation  
71 and stomatal opening (Christie et al., 1998; Kagawa et al., 2001; Kinoshita et al.,  
72 2001; Sakai et al., 2001; Sakamoto and Briggs, 2002). Each LOV domain harbors  
73 flavin mononucleotide (FMN) as a blue-light absorbing chromophore (Christie et  
74 al., 1998; Sakai et al., 2001) and transiently forms a cysteinyl adduct with a  
75 blue-light-excited FMN (Christie, 2007). This cysteinyl adduct undergoes thermal  
76 decay and LOV domains thus show dark reversion (Okajima, 2016). The  
77 photochemical reaction mediated through the LOV2 domain is indispensable for  
78 phot2 function and leads to their conformational change and activation as a  
79 Ser/Thr kinase (Christie et al., 2002; Christie, 2007). The lifetime of the  
80 cysteinyl-FMN adduct of phot2 LOV2 is 10-fold greater than that of phot1, which  
81 appears to be one of reasons why phot2 does not function under low intensity  
82 blue light conditions (Okajima et al., 2012). On the other hand, phot1 is a unique  
83 photoreceptor that mediates the phototropic responses in etiolated hypocotyls  
84 over a broad dynamic range of blue light intensities between  $10^{-5}$  and  $10^2$   $\mu\text{mol}$   
85  $\text{m}^{-2} \text{s}^{-1}$  (Sakai et al., 2001; Haga et al., 2015). The photochemical reaction at the  
86 LOV1 of phot1 is unnecessary for the phototropic response (Christie et al., 2002),  
87 but this domain itself is necessary for the induction of the phototropic responses  
88 under low intensity blue light conditions (Sullivan et al., 2008). The phot1 LOV1

89 domain thus appears to play an important role in the control of phot1  
90 photosensitivity, but the precise underlying molecular functions are yet  
91 unrevealed.

92           The ROOT PHOTOTROPISM2 (RPT2) protein is a signal transducer in  
93 *Arabidopsis* phototropism (Sakai et al., 2000). It localizes on the plasma  
94 membrane and forms a complex with phot1 in vivo (Inada et al., 2004). RPT2  
95 expression is suppressed in etiolated seedlings and upregulated by red- and/or  
96 blue-light irradiation (Sakai et al., 2000; Tsuchida-Mayama et al., 2010). The phys  
97 and crys are necessary for the induction of *RPT2* transcription  
98 (Tsuchida-Mayama et al., 2010). *Rpt2* loss-of-function mutants exhibit increased  
99 responses to very low intensity blue light at  $10^{-5}$   $\mu\text{mol m}^{-2} \text{s}^{-1}$  and decreased  
100 responses to blue light at  $10^{-3}$   $\mu\text{mol m}^{-2} \text{s}^{-1}$  or more during hypocotyl  
101 phototropism (Haga et al., 2015). On the other hand, the expression of *RPT2*  
102 prior to a phototropic stimulation in etiolated wild-type seedlings accelerates  
103 continuous light-induced phototropism (Haga et al., 2015). These findings have  
104 suggested that the light induction of RPT2 expression reduces the  
105 photosensitivity of phot1, which is required for the photosensory adaptation of  
106 phot1 and the second phototropism under bright light conditions (Haga et al.,  
107 2015).

108           In our present study, we tested the hypothesis that RPT2 controls the  
109 photosensitivity of phot1 through its LOV1 domain. A yeast two-hybrid assay  
110 indicated that RPT2 binds to the phot1 LOV1 domain and immunoblotting using

111 Phos-tag SDS-poly-acrylamide gels indicated that a *rpt2* mutation enhances the  
112 autophosphorylation of phot1, and that the *RPT2* overexpression suppresses  
113 this. These data indicated that RPT2 controls the autophosphorylation activity of  
114 phot1 through the LOV1 domain. We further showed that RPT2 expression is  
115 upregulated not only by the phys and crys but also by phots. Based on our current  
116 results, we propose that RPT2 acts as a molecular rheostat that maintains a  
117 moderate activation of phot1 under any light intensity conditions.

118

## 119 **RESULTS**

### 120 **RPT2 binds to the LOV1 domains of phot1**

121 Our previous study demonstrated that the N-terminal half of RPT2 (RPT2 N)  
122 including the BTB/POZ (broad complex, tramtrack and bric-à-brac/Pox virus and  
123 zinc finger) protein-protein interaction domain binds to the N-terminal half of  
124 PHOT1 that includes two LOV domains (Inada et al., 2004). We divided the  
125 N-terminal half of PHOT1 into 4 fragments and examined RPT2 N binding to  
126 these fragments or its kinase domain (PHOT1 C) using a yeast two-hybrid assay  
127 (Figure 1A: Inada et al., 2004). As shown in Figure 1B, RPT2 N bound only to the  
128 LOV1 domain (PHOT1 N2). We confirmed its binding using an in vitro pull-down  
129 assay. The hemagglutinin-tagged (HA-) RPT2 N proteins specifically interacted  
130 with the histidine/ProS2-tagged (His-) PHOT1 N2 proteins on metal affinity resins  
131 in contrast with His-PHOT1 N4 harboring the LOV2 domain (Figure 1C). These  
132 results suggest that RPT2 affects phot1 photosensitivity via the LOV1 domain.

133 Christie et al. (2002) reported previously that by using the  
134 LOV1Cys39Ala mutant, the LOV1 domain of phot1 is photochemically active but  
135 that its photochemical reaction is unessential for phot1 function. Our current  
136 yeast two hybrid assay data showed that the LOV1 domain harboring a Cys39Ala  
137 mutation (PHOT1 N2mut) also binds to RPT2 N as well as PHOT1 N2 (Figure  
138 1B). Furthermore, the *phot1 phot2* transgenic seedlings expressing the *PHOT1*  
139 gene with the LOV1Cys39Ala mutation showed a shortened time lag to the  
140 induction of phototropic responses by a red-light pretreatment (Supplemental  
141 Figure 1), which is dependent on *RPT2* (Haga et al., 2015). Our previous study  
142 had already indicated that RPT2 can form a complex with phot1 in vivo under  
143 both conditions of darkness and blue light (Inada et al., 2004). These results  
144 suggest that RPT2 binding and function are unaffected by the photochemical  
145 reaction of the phot1 LOV1 domain and the phosphorylation state of phot1.

146

#### 147 **RPT2 suppresses the autophosphorylation of phot1**

148 Our previous genetic study suggested that RPT2 reduces the photosensitivity of  
149 phot1, which is required for a second positive phototropism under bright light  
150 conditions (Haga et al., 2015). This indicated that RPT2 may suppress the activity  
151 of phot1. To test this possibility, we examined the autophosphorylation pattern of  
152 phot1 in both wild-type *Arabidopsis* seedlings and *rpt2* mutants grown on the  
153 surface of vertically oriented agar medium. We conducted immunoblotting  
154 analysis using a Phos-tag acrylamide gel for this experiment (Kinoshita and



155 Kinoshita-Kikuta, 2011), in which the migration of phosphorylated proteins is  
156 specifically retarded. We observed autophosphorylation patterns of phot1 in  
157 response to blue-light irradiation for 2 h at 0.001, 0.1 and 100  $\mu\text{mol m}^{-2} \text{s}^{-1}$   
158 (Figure 2A). When the wild-type seedlings were irradiated, the mobilities of  
159 PHOT1 proteins became much slower if the fluence rates were higher (Figure  
160 2A). These mobility shifts were more clearly observed using a Phos-tag  
161 acrylamide gel (+Phos-tag) compared with a normal SDS-polyacrylamide gel (-  
162 Phos-tag: Figure 2A). This result suggested that the autophosphorylation activity  
163 of phot1 increases as the fluence rates increase.

164         We next investigated the autophosphorylation pattern of phot1 during  
165 blue light irradiation. When we monitored the phosphorylation status of the  
166 PHOT1 protein under blue light conditions at 100  $\mu\text{mol m}^{-2} \text{s}^{-1}$  (Figure 2B),  
167 mobility shifts of this protein were detectable at 1 hour, but further irradiation  
168 suppressed phot1 autophosphorylation in parallel with the accumulation of RPT2  
169 proteins. Under blue light conditions at 0.1  $\mu\text{mol m}^{-2} \text{s}^{-1}$ , mobility shifts in the  
170 PHOT1 proteins were marginally detectable at 1 min, became saturated at 30  
171 min, but were suppressed at 60 and 120 min after the onset of irradiation in  
172 wild-type etiolated seedlings (Figure 2C).

173         *Arabidopsis* wild-type hypocotyls show a delayed phototropic response  
174 when grown along the surface of vertically oriented agar medium and a quick  
175 response when grown on the agar medium without touching the agar medium  
176 (Haga and Sakai, 2012; Sullivan et al., 2019). We examined the

177 autophosphorylation of phot1 in wild-type *Arabidopsis* seedlings grown on agar  
178 medium in 0.2 ml tubes (Haga et al., 2012). They showed similar phot1  
179 autophosphorylation patterns to those in the seedlings grown on vertically  
180 oriented agar medium (Supplemental Figure 2), suggesting that the phot1  
181 autophosphorylation activity in seedlings is unaffected by the friction or the  
182 moisture between the agar surface and the shoots. We therefore used the  
183 seedlings grown on the surface of vertically oriented agar medium in later  
184 analyses.

185           In the –Phos-tag gel, the *rpt2* mutation did not produce any obvious  
186 effect on the mobility shifts of the PHOT1 proteins (Figure 2A), as reported  
187 previously (Inada et al., 2004; Haga et al., 2015). However, in the +Phos-tag gel,  
188 the *rpt2* mutation appeared to cause a pronounced mobility shift in the PHOT1  
189 protein under blue light conditions at 0.001, 0.1 and 100  $\mu\text{mol m}^{-2} \text{s}^{-1}$  (Figure 2A).  
190 The mobility shift of PHOT1 with the *rpt2* mutation disappeared when the  
191 extracted proteins were treated with alkaline phosphatase (Supplemental Figure  
192 3), indicating that its shift reflects differences in phosphorylation state of PHOT1.  
193 Interestingly, the *rpt2* mutants did not exhibit any attenuation of phot1  
194 autophosphorylation at 2, 4 and 6 hours (Figure 2B) or at 60 and 120 min (Figure  
195 2C) after the onset of blue-light irradiation of 100 and 0.1  $\mu\text{mol m}^{-2} \text{s}^{-1}$ ,  
196 respectively. On the other hand, a constitutive *RPT2* expression line  
197 (*35Spro:RPT2*: Haga et al., 2015) showed an attenuation of  
198 phot1-autophosphorylation at 30 min after the onset of the blue-light irradiation

199 (Figure 2C). These results suggested that RPT2 proteins can suppress the  
200 autophosphorylation or enhance the dephosphorylation of phot1 and that a  
201 loss-of-function mutation in *RPT2* leads to a continuous hyperactivation of phot1  
202 in seedlings.

203           The effect of RPT2 on the autophosphorylation of phot2 was also  
204 examined using an anti-PHOT2 antibody, which recognizes both PHOT1 (~120  
205 kDa) and PHOT2 (~110 kDa; Supplemental Figure 4). When wild-type seedlings  
206 were irradiated with blue light at 0.001, 0.1, and 100  $\mu\text{mol m}^{-2} \text{s}^{-1}$ , mobility shifts  
207 in the PHOT2 proteins were detectable only at 100  $\mu\text{mol m}^{-2} \text{s}^{-1}$  (Figure 2D,  
208 dotted area). Under blue-light conditions of 100  $\mu\text{mol m}^{-2} \text{s}^{-1}$ , the mobility shifts of  
209 the PHOT2 proteins were marginally detectable at 1 min, saturated at 30 min,  
210 and attenuated at 120 min after the onset of the irradiation in wild-type etiolated  
211 seedlings (Figure 2E). Those autophosphorylation patterns were also detected in  
212 the *rpt2* mutants and the *35Spro::RPT2* transgenic lines (Figure 2E and 2F).  
213 Although green fluorescent protein (GFP)-fused phot2 formed a complex with  
214 RPT2 in vivo (Supplemental Figure 5A and 5B) and RPT2 N showed binding  
215 activity to the phot2 LOV1 domain in yeast (Supplemental Figure 5C), the results  
216 of our phenotypic analysis suggested that RPT2 has no significant impact on the  
217 autophosphorylation of phot2. This finding was consistent with the finding of a  
218 previous study that the *rpt2* mutation has no effect on phot2-dependent  
219 phototropic responses (Inada et al., 2004).

220           We next examined the inhibitory effects of RPT2 on the

221 autophosphorylation activity of phot1 using an in vitro phosphorylation assay  
222 (Figure 3). This assay was performed with microsomal proteins extracted from  
223 *rpt2* mutants transformed with a *pMDC7-RPT2* construct, in which the expression  
224 of RPT2 is inducible by estradiol (Est) treatment (Supplemental Figure 6: Zuo et  
225 al., 2000). The autophosphorylation of phot1 was detected as a radiolabeled 120  
226 kDa protein in the microsomal fraction as described previously (Liscum and  
227 Briggs, 1995). As expected, blue-light irradiation caused the phosphorylation of  
228 these 120 kDa proteins in the microsomal fractions of the *pMDC7-RPT2*  
229 seedlings and *pER8* vector control line (Figure 3A). On the other hand, Est  
230 treatments suppressed this phot1 phosphorylation in the *pMDC7-RPT2*  
231 seedlings but not in the *pER8* vector control line (Figure 3). Our immunoblotting  
232 analysis confirmed that PHOT1 protein expression was comparable among all of  
233 the microsomal fractions and that the RPT2 proteins were expressed only in the  
234 microsomal fraction of Est-treated *pMDC7-RPT2* seedlings (Supplemental  
235 Figure 6B). These results suggested that Est-induced RPT2 proteins suppress  
236 the in vitro autophosphorylation of phot1.

237         Our present analyses suggested that RPT2 proteins either suppress  
238 phot1 autophosphorylation or enhance its dephosphorylation. If a loss-of-function  
239 mutation in *RPT2* leads to an enhanced phosphorylation of phot1 due to a block  
240 in its dephosphorylation and RPT2 overexpression enhances its  
241 dephosphorylation, treatments with protein phosphatase inhibitors seemed to  
242 impair the effects of a loss-of-function mutation and overexpression of *RPT2*. We

243 therefore next examined the effects of protein phosphatase inhibitors in the *rpt2*  
244 mutants and the *35Spro:RPT2* transgenic lines by immunoblotting analysis using  
245 a Phos-tag acrylamide gel. First, we examined the effects of the protein  
246 phosphatase inhibitors cantharidin (CN) or okadaic acid (OKA) on the  
247 dephosphorylation of phot1. Autophosphorylated PHOT1 proteins in the  
248 wild-type seedlings with a pulse irradiation of blue light for 2 min at  $100 \mu\text{mol m}^{-2}$   
249  $\text{s}^{-1}$  were dephosphorylated with a subsequent dark incubation for 14 min  
250 (Supplemental Figure 7). When the seedlings were treated with CN or OKA, the  
251 mobility of the PHOT1 protein became slightly retarded in Phos-tag SDS-PAGE  
252 (Supplemental Figure 7). These results indicated that CN and OKA have some  
253 inhibitory effects on phot1 dephosphorylation.

254 We next examined the effects of these inhibitors in the *rpt2* mutants.  
255 When wild-type seedlings were irradiated with blue light for 0.5 h in the CN- or  
256 OKA-containing medium with a red-light pretreatment (for the induction of RPT2:  
257 Haga et al. 2015), the PHOT1 proteins showed a hyper mobility shift in contrast to  
258 the untreated seedlings (Figure 4A). The phosphorylation of phot1 was enhanced  
259 in the *rpt2* mutants in comparison with those in wild-type seedlings independently  
260 of the treatments of CN or OKA (Figure 4A). The effects of CN and OKA in the  
261 *35Spro:RPT2* transgenic line were also examined (Figure 4B). Red light  
262 pretreatment was not done here to ensure that RPT2 expression was not induced  
263 in the wild-type seedlings. Constitutive expression of RPT2 suppressed the  
264 phosphorylation of phot1 in the *35Spro:RPT2* transgenic lines without being

265 affected by the CN and OKA treatments (Figure 4B). These results suggested  
266 that RPT2 suppresses the autophosphorylation activity of phot1 but does not  
267 enhance the dephosphorylation of phot1.

268

### 269 **RPT2 is induced by blue-light irradiation in a post-transcriptional manner**

270 Our current results suggested that the induction of RPT2 expression by light  
271 irradiation is an important mechanism for controlling both photosensitivity and the  
272 autophosphorylation activity of phot1. We thus investigated the light inducibility of  
273 RPT2 expression in more detail. We first observed the RPT2 expression patterns  
274 using transgenic plants carrying the *RPT2pro:GUS* gene and the  
275 *RPT2pro:RPT2-VENUS* gene. GUS staining was detected in a root tip under  
276 darkness in the 2-day-old etiolated seedlings carrying the *RPT2pro:GUS* gene  
277 (Figure 5A, 5D, and 5G). Both red- and blue-light irradiation enhanced its  
278 expression in whole seedlings, most notably the hypocotyls, hooks, and root tips  
279 including the elongation zone, in a similar manner (Figure 5B, 5C, 5E, 5F, 5H,  
280 and 5I). When the expression patterns of the *RPT2pro:RPT2-VENUS* gene in the  
281 *rpt2* mutants were analyzed, we noticed a clear induction of RPT2-VENUS  
282 proteins in the aerial part of seedlings (Figure 5L and 5S), especially the  
283 elongation zones of the hypocotyls (Figure 5O), and the elongation zone of roots  
284 (Figure 5R), but only under blue-light irradiation and not red-light irradiation  
285 (Figure 5K, 5N and 5Q). These results indicated that both red- and blue-light  
286 irradiation can activate the *RPT2* promoter but that only blue-light irradiation can

287 induce the RPT2-VENUS proteins effectively.

288

289 **The accumulation of RPT2 proteins is enhanced by phot activation**

290 The RPT2-VENUS fluorescent signal was detectable in the elongation zones of  
291 hypocotyls and roots (Figure 5O and 5R), in which the strong expression of *phot1*  
292 have been reported (Sakamoto and Briggs, 2002). Thus, we hypothesized that  
293 RPT2 proteins are unstable under red-light conditions and that *phot1* stabilizes  
294 them under blue-light conditions. We tested this using immunoblotting analysis.  
295 When the wild-type seedlings were irradiated for 6 hours with red or blue light at  
296  $10 \mu\text{mol m}^{-2} \text{s}^{-1}$ , RPT2 protein expression was induced in both cases but  
297 blue-light irradiation was much more effective (Figure 6A and 6B). On the other  
298 hand, the accumulation of RPT2 proteins under blue-light conditions was  
299 attenuated in the *phot1* mutants, which was statistically significant (Figure 6A and  
300 6B). The mutation of the *NPH3* gene, which is required for the *phot1* signaling  
301 during phototropism (Motchoulski and Liscum, 1999), also caused a decrease of  
302 RPT2 accumulation under blue-light conditions (Figure 6A and 6B). Neither *phot1*  
303 nor *nph3* mutations affected the red-light induced accumulation of RPT2 (Figure  
304 6A and 6B). qRT-PCR analysis confirmed that the blue-light induction of *RPT2*  
305 transcripts was not affected by mutations of *phot1* and *nph3* (Figure 6C). These  
306 results suggested that *phot1* and its associated protein NPH3 contribute to the  
307 accumulation of RPT2 proteins under blue-light conditions in a  
308 post-transcriptional manner.

309           We next examined whether the sole activation of the *phot1*  
310 photoreceptor is sufficient for the accumulation of RPT2 proteins using *phot1*  
311 mutants transformed with a *pMDC7-PHOT1<sup>I608E</sup>* construct, in which constitutively  
312 active PHOT1 proteins (PHOT1<sup>I608E</sup>; Harper et al., 2004) are inducible by Est  
313 treatment. In the etiolated seedlings of the *pER8* vector control line, Est treatment  
314 had no effect on the RPT2 protein levels or the phosphorylation status of the  
315 NPH3 protein (Figure 6D). On the other hand, in the *phot1* mutants transformed  
316 with a *pMDC7-PHOT1<sup>I608E</sup>* construct (#1 and #2), Est exposure caused the  
317 accumulation of RPT2 protein in the absence of blue-light irradiation. This  
318 suggested that the accumulation of RPT2 can be caused by *phot1* activation  
319 alone, even in darkness.

320           The mobility shift of the NPH3 protein, which reflects a *phot1*-induced  
321 dephosphorylation (Pedmale and Liscum, 2007; Tsuchida-Mayama et al., 2008),  
322 was also observed in the #2 transgenic line (Figure 6D), suggesting that  
323 *phot1<sup>I608E</sup>* expression can cause NPH3 dephosphorylation under darkness. A  
324 previous study reported that the expression of *PHOT1<sup>R472H</sup>*, which is another  
325 constitutively active variant of *phot1*, was not sufficient to promote NPH3  
326 dephosphorylation under darkness (Petersen et al., 2017). The discrepancies  
327 between the prior result and our current observations may be due to differences  
328 in the natures of *phot1<sup>I608E</sup>* and *phot1<sup>R472H</sup>* and/or the transgene expression  
329 levels.

330           We next analyzed the fluence-rate and time dependence of RPT2



331 protein accumulation. When wild-type seedlings were irradiated with blue light at  
332 0.01 to 100  $\mu\text{mol m}^{-2} \text{s}^{-1}$  for 6 hours, the RPT2 protein levels were increased as  
333 the fluence rates of blue light increased (Figure 6E). This induction seemed to be  
334 caused by both a transcriptional regulation of *phy* and *cry* (Tsuchida-Mayama et  
335 al., 2010) and a post-transcriptional regulation of *phot1*. In the *phot1* mutants, a  
336 weakened induction of the RPT2 protein was observed at all fluence rates  
337 examined (Figure 6E), suggesting that *phot1* contributes to RPT2 accumulation,  
338 at least between 0.01 to 100  $\mu\text{mol m}^{-2} \text{s}^{-1}$ . In the *phot1 phot2* double mutants, the  
339 blue-light induction of RPT2 at 100  $\mu\text{mol m}^{-2} \text{s}^{-1}$  was obviously lower than that in  
340 the *phot1* single mutant (Figure 6E), suggesting that *phot2* also contributes to the  
341 accumulation of RPT2 proteins at 100  $\mu\text{mol m}^{-2} \text{s}^{-1}$ . When the seedlings were  
342 irradiated by blue light at 0.1 or 10  $\mu\text{mol m}^{-2} \text{s}^{-1}$  for various times, the induction of  
343 RPT2 proteins was detectable at least after 1 hour of the onset of irradiation in  
344 both wild type and *phot1* seedlings, but at a higher level in wild type (Figure 6F  
345 and 6G). This observation suggested that both the transcriptional induction of  
346 *RPT2* by *phys* and *crys* (Tsuchida-Mayama et al., 2010) and the  
347 post-transcriptional induction of *phot1* contributes to an early induction of RPT2  
348 under both fluence-rate conditions.

349 Previous study has indicated that *phot1* is localized to the plasma  
350 membrane region in the epidermal cells and the cortical cells of both root and  
351 hypocotyl of *Arabidopsis* etiolated seedlings (Sakamoto and Briggs, 2002). When  
352 the *rpt2* transgenic seedlings expressing RPT2-VENUS were irradiated by blue

353 light from above, a fluorescent image of a transverse section of upper hypocotyls  
354 showed that the RPT2-VENUS proteins were localized to the plasma membrane  
355 region in all tissues of hypocotyls and were strongly expressed in the cortex  
356 (Figure 7A). These expression and subcellular localization patterns were similar  
357 with those of phot1 (Sakamoto and Briggs, 2002).

358 Suzuki et al. (2019) has reported that unilateral irradiation of blue light  
359 induces the asymmetric distribution of phosphorylated Zmphot1 in coleoptiles of  
360 *Zea mays* in response to the gradient of blue light intensity in these organs. When  
361 the seedlings were unilaterally irradiated, the RPT2-VENUS proteins were often  
362 expressed more strongly on the irradiated side of the hypocotyls than on the  
363 shaded side (~55% of seedlings; Figure 7B and 7C). On the other hand, there  
364 were also seedlings showing symmetric expression patterns (~21%) or a strong  
365 expression of RPT2-VENUS on the shaded side (~24%). As the light induction of  
366 endogenous RPT2 proteins was already detectable at 1 h after the onset of blue  
367 light irradiation at  $10 \mu\text{mol m}^{-2} \text{s}^{-1}$  in the immunoblotting analysis (Figure 6E),  
368 their distribution patterns at 1 h could also be observed. The RPT2-VENUS  
369 fluorescent signal, however, was barely detectable (data not shown). One hour of  
370 irradiation seemed to be too short for the expression, maturation and  
371 accumulation of RPT2-VENUS proteins to detect its fluorescence. Therefore, we  
372 could not draw any conclusions regarding the asymmetric induction of RPT2 in  
373 hypocotyls irradiated by unilateral blue light in our present study.

374

375 **RPT2 proteins are degraded through the ubiquitin-proteasome pathway**

376 We examined whether the RPT2 protein is degraded through a  
377 ubiquitin-proteasome pathway. When etiolated seedlings of wild type and *phot1*  
378 *phot2* double mutants were treated with the proteasome inhibitor MG132 for 3  
379 hours under blue light conditions at  $10 \mu\text{mol m}^{-2} \text{s}^{-1}$ , RPT2 protein accumulated  
380 in the double mutant but not in wild type. This suggested that the *phot1 phot2*  
381 double mutants showed a destabilization of RPT2 proteins in a  
382 proteasome-dependent manner (Figure 8A). In addition, exposure to MG132 led  
383 to the accumulation of RPT2 in wild-type seedlings under red-light conditions but  
384 not under blue-light conditions (Supplemental Figure 8). These results suggested  
385 that RPT2 is degraded in a proteasome-dependent manner and is stabilized  
386 though the activation of phototropins.

387 To detect polyubiquitinated RPT2 under red-light irradiation, we  
388 attempted to immunoprecipitate it from extracts of *UBIQUITIN3 (UBQ3)*  
389 overexpression lines (*35Spro:UBQ3*). Although this was not successful, we  
390 unexpectedly found a significant decrease of RPT2 protein in the *35Spro:UBQ3*  
391 transgenic lines under both red- and blue-light conditions (Figure 8B).  
392 Correspondingly, these transgenic lines showed an abnormality in hypocotyl  
393 phototropism i.e. their phototropic curvatures were moderate under weak  
394 intensity blue-light conditions and decreased as the fluence rate increased  
395 (Figure 8C), in a comparable manner to the *rpt2* mutants (Haga et al., 2015). On  
396 the other hand, *UBQ3* overexpression had no effect on the expression patterns of

397 PHOT1, PHOT2 or NPH3 (Figure 8B), or on the growth of seedlings  
398 (Supplemental Figure 9A and 9B). These results suggested that the RPT2  
399 proteins are degraded through the ubiquitin-proteasome pathway and that the  
400 activation of phot1 and phot2 may negatively regulate the polyubiquitination of  
401 RPT2 proteins and/or its degradation by proteasomes.

402

### 403 **DISCUSSION**

404 Our current results demonstrate that RPT2 suppresses the autophosphorylation  
405 of phot1 under blue-light conditions. Previous studies have indicated that the  
406 phot1 LOV1 domain is necessary for the induction of the phototropic responses  
407 under low intensity blue-light conditions (Sullivan et al., 2008) and that the light  
408 induction of RPT2 expression suppresses phot1 photosensitivity, which is  
409 required for the photosensory adaptation of phot1 to high intensity blue light  
410 (Haga et al., 2015). These prior results and our current data suggest that RPT2  
411 negatively regulates the autophosphorylation of phot1 through the LOV1 domain,  
412 which is probably required for a formation of a suitable gradient of phot1 activity  
413 between the irradiated side and the shaded side in accordance with the high  
414 intensity unilateral blue light. Hence, this is the photosensory adaptation  
415 mechanism of phot1 in the second positive phototropism of Arabidopsis etiolated  
416 hypocotyls. The expression level of RPT2 proteins is increased in response to an  
417 increase of blue light intensity (Figure 6E), indicating that RPT2 functions as a  
418 molecular rheostat that maintains a moderate activation level of phot1 in etiolated

419 hypocotyls of *Arabidopsis* seedlings under any light intensity conditions.

420           The molecular mechanisms by which RPT2 functions in the suppression  
421 of phot1 activity remain to be elucidated. Some prior studies have suggested that  
422 the LOV1 domain mediates the dimerization of phot1, which thereby enhances  
423 the autophosphorylation of this blue-light photoreceptor (Nakasako et al., 2004;  
424 Xue et al., 2018). Thus, RPT2 may inhibit the LOV1-mediated dimerization of  
425 phot1 to suppress its kinase activity. Previous studies had also suggested that  
426 LOV1 suppresses the decay of the cysteinyl-FMN adduct of LOV2 and enhances  
427 the Ser/Thr kinase activity of the phot1s (Kaiserli et al., 2009; Okajima et al., 2012;  
428 Okajima 2016). RPT2 may enhance the decay of the cysteinyl-FMN adduct of  
429 phot1 LOV2 through the binding to LOV1 and thus suppress the Ser/Thr kinase  
430 activity of phot1. Although our current results suggest that RPT2 suppresses the  
431 autophosphorylation activity of phot1, the possibility of enhancement of phot1  
432 dephosphorylation by RPT2 still cannot be excluded. RPT2 might play a role as a  
433 scaffold of protein phosphatases to dephosphorylate phot1. We also need to  
434 examine in the future whether a defect of RPT2 binding to the LOV1 domain  
435 indeed affects the autophosphorylation of phot1. Further studies are warranted to  
436 elucidate the mechanisms underlying the function of the LOV1 domain and RPT2  
437 in phototropin photoactivation in more detail.

438           The post-transcriptional regulation of RPT2 forms a negative feedback  
439 loop of phot1 activation. This regulation appears to ensure the formation of a  
440 gradient of phot1 signaling activity between the irradiated and shaded sides of

441 plant organs under a broad range of blue-light intensity. This gradient then seems  
442 to induce light-induced differential growth including not only phototropic  
443 responses but also leaf flattening and cotyledon/leaf positioning (Sakai et al.,  
444 2000; Harada et al., 2013). Previous studies have reported that unilateral blue  
445 light irradiation results in differential NPH3 aggregate formation in response to  
446 phot1 activity across the etiolated hypocotyl, which suppresses and fine-tunes  
447 NPH3 activity (Sullivan et al., 2019), and that the light-induced RPT2 proteins  
448 suppresses the dephosphorylation and aggregation of NPH3 proteins in the  
449 etiolated seedlings (Haga et al., 2015). Our current study findings strongly  
450 suggest that RPT2 indirectly suppresses their dephosphorylation and  
451 aggregation through the suppression of phot1 activity. On the other hand, our  
452 current study results also indicate that NPH3 partially contributes to the  
453 stabilization of RPT2 proteins under blue-light conditions (Figure 6B). Thus, the  
454 aggregation of NPH3 proteins might decrease the stabilization of RPT2 proteins  
455 at the irradiated side and fine-tune the phot1 activity at both the irradiated and the  
456 shaded side. Both adjustments of the light induction of RPT2 and of the plasma  
457 membrane localization of NPH3 probably contribute to the fine-tuning of phot1  
458 signaling across hypocotyls, and an induction of phototropic responses under  
459 various light conditions in the etiolated seedlings of *Arabidopsis*. On the other  
460 hand, RPT2 is not required for the second positive phototropism in de-etiolated  
461 hypocotyls of *Arabidopsis* seedlings (Sullivan et al., 2019). Other unknown  
462 factors and/or mechanisms may suppress the excessive activation of phot1 in

463 green seedlings.

464           Our current observations indicate that RPT2 is degraded by the  
465 ubiquitin-proteasome pathway and that phot1 activation suppresses this  
466 degradation. This is the first demonstration of a protein stabilization control  
467 function of the phot1s. The mechanism by which the RPT2 protein is ubiquitinated  
468 or stabilized under blue-light conditions has been a question of some importance.  
469 NPH3 is an essential signal transducer during phototropism and shows binding  
470 activity towards RPT2 and possesses ubiquitin E3 ligase activity with Cullin3  
471 (Motchoulski and Liscum, 1999; Inada et al., 2004; Roberts et al., 2011). Although  
472 we speculated that NPH3 may ubiquitinate RPT2 and promote its degradation  
473 under red-light conditions, our immunoblotting analysis revealed that NPH3  
474 contributes to its accumulation under blue-light conditions (Figure 6A). As RPT2  
475 belongs to the same protein family as NPH3 and also has a BTB/POZ domain  
476 which often interacts with Cullin3 (Genschik et al., 2013), it may be ubiquitinated  
477 on its own, and its binding to the active forms of the phot1s may suppress its  
478 polyubiquitination and degradation. The issue of whether phot1 controls a  
479 ubiquitin-proteasome pathway also remains to be resolved.

480           *RPT2* belongs to the *NPH3/RPT2-like (NRL)* gene family (Sakai, 2005)  
481 and other NRL members might also have a similar function to RPT2. RPT2 did  
482 not show an obvious effect on the suppression of the phot2 activity, although it  
483 can bind to its LOV1 domain and form a complex with phot2 in vivo. However, for  
484 example, NRL PROTEIN FOR CHLOROPLASTMOVEMENT1 (NCH1) functions

485 in the chloroplast accumulation response in parallel with RPT2 (Suetsugu et al.,  
486 2016). Suetsugu et al. (2016) revealed that *nch1* mutants show an enhancement  
487 of the phot2-induced avoidance response. One of the hypotheses from this is that  
488 NCH1 suppresses the photosensitivity and/or photoactivation of phot2 with  
489 RPT2. Thus, the relationships between the NRL members and phototropins in  
490 various plants should be reexamined in future studies.

491

## 492 **METHODS**

493

### 494 **Plant Materials and Growth Conditions**

495 *Arabidopsis thaliana* ecotype Columbia (Col) was used as the wild type control.  
496 Mutant seeds of *rpt2-2* (Col background) and *nph3-102* (Salk\_110039; Col  
497 background) were obtained as described previously (Inada et al., 2004;  
498 Tsuchida-Mayama et al., 2008). The *phot1*-Salk146058 (Col background) and  
499 *phot2*-Salk142275 mutants (Col background) were obtained from the  
500 Arabidopsis Biological Resource Center (Alonso et al., 2003) and crossed to  
501 obtain a *phot1 phot2* double mutant. The *rpt2-2* mutants transformed with a  
502 *35Spro:RPT2* gene or a *RPT2pro:RPT2-VENUS* gene were prepared as  
503 described previously (Tsuchida-Mayama et al., 2010; Haga et al., 2015).  
504 Transgenic Col lines harboring a *RPT2pro:GUS* gene were also prepared as  
505 described previously (Inada et al., 2004). The *phot1 phot2* mutants transformed  
506 with a *35Spro:PHOT1<sup>LOV1Cys39Ala</sup>* gene were kindly provided by Professor John



507 Christie (University of Glasgow).

508           The *pMDC7-RPT2* transgenic lines were generated as follows. The  
509 *RPT2* coding region was subcloned into the entry vector pENTR/D-TOPO  
510 (Invitrogen) and shuttled via an LR clonase reaction (Invitrogen) into the estrogen  
511 (Est)-inducible vector pMDC7 (Curtis and Grossniklaus, 2003), which was kindly  
512 provided by Professor Nam-Hai Chua (Rockefeller University, New York, NY).  
513 The *pMDC7-RPT2* plasmid was used for the transformation of *Agrobacterium*  
514 *tumefaciens*, which was then used for subsequent transformations of *rpt2-2*  
515 mutants. Several independent *rpt2* transgenic lines showed phototropism  
516 complementation following Est treatment (Supplemental Figure 6A). pER8 is an  
517 original vector of pMDC7 that lacks the Gateway cassette (Zuo et al., 2000) and  
518 was used for the transformation of *A. tumefaciens*, which was then used for  
519 subsequent transformations of Col wild type for use as a vector control line.

520           The *pMDC7-PHOT1<sup>1608E</sup>* transgenic lines were generated as follows.  
521 The *PHOT1<sup>1608E</sup>* mutated cDNA was generated from *PHOT1* cDNA by  
522 PCR-based site-directed mutagenesis using *PHOT1*-gene specific primers  
523 including 5'-ACTGCAGTTTTTTCACCAGGTCTTCTCCCTC-3' and 5'-  
524 ACTGCAGTGAATGAAGATGAAGCGGTTTCGAGAACT-3' (underlined bases  
525 denote the Glu [E] codon 608; double underlines indicate the PstI sites for  
526 subsequent subcloning), subcloned into the entry vector pDONR222 (Invitrogen),  
527 and shuttled into pMDC7 via an LR clonase reaction. The *pMDC7-PHOT1<sup>1608E</sup>*  
528 plasmid was used for the transformation of *A. tumefaciens*, which was then used

529 for subsequent transformations of *phot1*-Salk146058 mutants.

530           The *35Spro:UBQ3* transgenic lines were generated as follows. The  
531 POLYUBIQUITIN 3 (UBQ3) coding region was amplified from Col genome DNA  
532 by PCR using *UBQ3*-gene specific primers (Supplemental Table S1), subcloned  
533 into the entry vector pENTR/D-TOPO, and shuttled via an LR clonase reaction  
534 into the cauliflower mosaic virus 35S promoter-containing binary vector pH35GS,  
535 which was kindly provided by Professor Taku Demura (Nara Institute of Science  
536 and Technology, Nara, Japan). The resulting *pH35GS-UBQ3* plasmid was used  
537 for the transformation of *A. tumefaciens*, which was then used for subsequent  
538 transformations of wild type (Col) plants.

539           For experiments, the seeds were surface-sterilized and plated in Petri  
540 dishes with half-strength Okada and Shimura medium containing 1.5% agar, as  
541 described previously (Ohgishi et al., 2004). Seeds were kept at 4°C for 3 days  
542 and then exposed to red light for 6 h to induce uniform germination. After  
543 germination was induced, the Petri dishes were positioned vertically to let the  
544 seedlings grow on the surface of the agar at 21 to 22°C under dark conditions.  
545 Blue-light and red-light irradiations were performed under various conditions with  
546 light-emitting diodes (Ohgishi et al., 2004), as described in the Figure legends.

547

#### 548 **Yeast Two-Hybrid Analysis**

549 The GAL4 DNA-binding domain vector pGBDKT7-GWRFC was constructed by  
550 insertion of the Gateway reading frame cassette RfcC (Invitrogen) into the

551 Klenow-Fragment-treated NdeI-Sall sites of pGBKT7 (pGBDKT7: Clontech,  
552 <http://www.clontech.com>). PCR was used to generate the coding sequences of  
553 PHOT1 and PHOT2 with gene specific primers (Supplemental Table S1). A DNA  
554 fragment for PHOT1 N2mut was separately generated by PCR using N2 FW and  
555 N2mut RV and N2mut FW and N2 RV primers, and then combined by PCR using  
556 N2 FW and N2 RV primers. These amplified products were subcloned into the  
557 entry vector pENTR/D-TOPO and shuttled into the pGBDKT7-GWRFC plasmid.  
558 The GAL4 transcription-activating domain vector pGADT7 and its derivative  
559 pGADT7-RPT2 N were prepared as described previously (Inada et al., 2004).  
560 Pairwise combinations of vectors were co-transformed into the yeast strain Y187  
561 (Clontech) and plated onto the same selective medium. Quantitative  
562  $\beta$ -galactosidase assays were performed in liquid cultures of yeast using  
563 *o*-nitrophenyl- $\beta$ -D-galactopyranoside (Ausubel et al., 2001). One unit of  $\beta$ -Gal  
564 activity was defined as the amount of enzyme required to convert 1  $\mu$ mol of  
565 *o*-nitrophenyl- $\beta$ -D-galactopyranoside to *o*-nitrophenol and D-galactose in 1 min at  
566 30°C.

567

#### 568 **In vitro Pull-Down Assay**

569 To prepare phot1 LOV1 and LOV2 proteins, DNA fragments for *PHOT1* N2 and  
570 N4 in pENTR/D-TOPO (Invitrogen) were transferred into the pCold ProS2  
571 plasmid (TaKaRa) harboring a gateway reading frame cassette (Invitrogen).  
572 These constructs were introduced into *Escherichia coli* strain BL21 (DE3) pLysS

573 (Novagen), and His-ProS-tagged PHOT1 N2 and N4 proteins (His-PHOT1N2  
574 and –PHOT1N4) were prepared from the transformed lines in accordance with  
575 the manufacturer's protocol. HA-tagged RPT2 N proteins were prepared with *in*  
576 *vitro* transcription and translation of pGADT7-RPT2 N using the TNT Quick  
577 Coupled Transcription/Translation Systems (Promega).

578 Each purified protein preparation of His-PHOT1 N2 and N4 was  
579 incubated with TALON Magnetic Beads (TaKaRa) at 4°C for 30 min and further  
580 incubated at 4°C for 30 min with *in vitro* transcription and translation reactant  
581 containing RPT2 N. The beads were then collected on the magnetic rack and  
582 washed five times with washing buffer (sodium phosphate buffer pH 7.0, 150 mM  
583 NaCl, 0.2% Triton-X100). The proteins were then released from the beads into 50  
584 µL of 1× SDS gel loading buffer and resolved by SDS-PAGE.

585

### 586 **Immunoblotting Analysis**

587 For immunoblotting of Phos-tag SDS-PAGE gels, total proteins were extracted  
588 from etiolated seedlings in a buffer containing 50 mM Tris-MES, pH 7.5, 300 mM  
589 sucrose, 150 mM NaCl, 10 mM potassium acetate, 0.2% Triton X-100, and a  
590 protease inhibitor mixture (Complete Mini EDTA-free; Roche Diagnostics). The  
591 extracts were then centrifuged at 10,000 g at 4°C for 10 min to remove cell debris  
592 and the supernatants were collected and mixed with a half volume of 3× SDS gel  
593 loading buffer, and boiled at 95°C for 15 min. The samples were separated with  
594 6% SDS-PAGE gels containing 2 µM Phos-tag (FUJIFILM Wako Pure Chemical

595 Corporation) in accordance with the previously described “Zn<sup>2+</sup>-Phos-tag SDS  
596 PAGE” method (Kinoshita and Kinoshita-Kikuta, 2011). Following  
597 electrophoresis, the gels were twice washed with methanol-free transfer buffer  
598 (25 mM Tris, 192 mM glycine) with 10 mM EDTA for 10 min and then once with  
599 methanol-free transfer buffer without EDTA for 10 min. The separated total  
600 proteins were then blotted onto a PVDF membrane using a wet tank blotting  
601 system at a constant voltage of 350 mA for 4 h. Later immunoblotting steps were  
602 performed as described previously (Inada et al., 2004). For alkaline phosphatase  
603 treatment, microsomal pellets were obtained as described previously (Inada et  
604 al., 2004) and resuspended in the 1× NEBuffer 3 (NEB) with 0.5% Triton-X100  
605 and protease inhibitor mixture (Complete Mini EDTA-free; Roche Diagnostics).  
606 30 µg of microsomal proteins were then treated with 30 units of calf intestinal  
607 alkaline phosphatase (TaKaRa) at 37°C for 2 h. The reaction was stopped adding  
608 3× SDS gel loading buffer.

609 For immunoblotting of SDS-PAGE gels without Phos-tag, total proteins  
610 were extracted, separated on 6, 7.5, or 10% SDS-PAGE gels, and blotted onto  
611 PVDF membranes, as described previously (Inada et al., 2004). Anti-RPT2,  
612 anti-PHOT1, and horseradish peroxidase (HRP)-conjugated anti-rabbit IgG  
613 antibodies were prepared as described previously (Haga et al., 2015).  
614 Anti-PHOT2 antiserum was produced in rabbit using 10× His-tagged PHOT2  
615 products incorporating residues 294-474 as the antigen. HRP activity was  
616 detected with the super-signal west femto maximum sensitivity substrate

617 (Thermo Scientific) and the Image Quant LAS4000 Mini device (GE Healthcare).  
618 As a loading control, the protein-blotted membranes were stained using the  
619 Pierce reversible protein staining kit (Thermo Scientific). The results were  
620 confirmed using independent samples. For the statistical analysis, the signal  
621 intensities of the protein bands were quantified with Fiji software (Schindelin et  
622 al., 2012).

623

#### 624 **In vitro Phosphorylation Assay**

625 In vitro phosphorylation assays of a 120-kDa protein in microsomal membranes  
626 were performed as described previously (Sakai et al., 2000), with some  
627 modifications. Briefly, microsomal membrane pellets were obtained from  
628 approximately 650 two-day-old etiolated transgenic seedlings of *pMDC7-PRT2*  
629 and *pER8*, which were grown on the half-strength OS agar medium with or  
630 without 10  $\mu$ M estradiol. The pellets were resuspended in 30  $\mu$ L of  
631 phosphorylation buffer (50 mM Tris-MES, pH 7.5, 5 mM MgSO<sub>4</sub>, 150 mM NaCl, 1  
632 mM EGTA, 1 mM DTT, 0.5% Triton X-100, and a protease inhibitor mixture  
633 [Complete Mini EDTA-free; Roche Diagnostics]) by pipetting. All manipulations  
634 were performed at 4°C under a dim red safelight.

635 Twenty micrograms of microsomal extract were diluted to a final volume  
636 of 9  $\mu$ L in phosphorylation buffer and  $\gamma$ -<sup>32</sup>P-ATP was added to a final  
637 concentration of 200  $\mu$ M (specific activity, 2.5 Ci/mmol). The membrane extracts  
638 were then incubated for 2 min at 30°C and irradiated with blue light at 10  $\mu$ mol m<sup>-2</sup>

639  $^2 \text{ s}^{-1}$  for 16 min. Dark control samples were mock-irradiated. After the irradiations,  
640 the samples were mixed with an equal volume of 2× SDS gel loading buffer to  
641 stop the reaction. Ten micrograms of each sample were then electrophoresed on  
642 an a 6% SDS–PAGE gel. Gels were dried and then autoradiographed by  
643 exposure to X-ray film. The images of these films were recorded with a scanner  
644 (ES8500; Epson) and the signal intensities of the 120 kDa protein were quantified  
645 with Fiji software (Schindelin et al., 2012).

646

#### 647 **Treatments of Protein Phosphatase Inhibitors**

648 Cantharidin and okadaic acid (CN and OKA: Fujifilm Wako) were prepared as 50  
649 mM and 1 mM stock solutions, respectively, in dimethyl sulfoxide (DMSO). The  
650 treatments with these chemicals were performed as described previously  
651 (Sullivan et al., 2019) with brief modifications. Briefly, the aerial portions of the  
652 hypocotyls were prepared from two-day-old etiolated seedlings with a blade  
653 under safe green light conditions. Red light-irradiation at  $10 \mu\text{mol m}^{-2} \text{ s}^{-1}$  for 2 min  
654 was performed prior to preparation of the segment. The segments were then  
655 dipped in half strength OS solution containing 30  $\mu\text{M}$  CN, 1  $\mu\text{M}$  OKA or an  
656 equivalent volume of DMSO and vacuum infiltrated for 15 min. After a  
657 subsequent incubation under darkness for 105 min at 60 rpm, the segments were  
658 irradiated with blue light at  $0.1 \mu\text{mol m}^{-2} \text{ s}^{-1}$  for 30 min, immediately harvested  
659 with forceps, and frozen with liquid nitrogen.

660

## 661 **GUS Histochemical Analysis**

662 Transgenic seedlings carrying the *RPT2pro:GUS* gene were stained with  
663 5-bromo-4-chloro-3-indolyl- $\beta$ -glucuronide (X-Gluc), as described previously  
664 (Nagashima et al., 2008). Seedling images were obtained with an MZ-16FA  
665 /DFC500 digital stereomicroscope (Leica, <http://www.leica-microsystems.com>).

666

## 667 **VENUS Imaging**

668 VENUS fluorescence was visualized with an MZ-16FA/DFC500 digital  
669 stereomicroscope with the YFP filter (Leica). Confocal fluorescence images were  
670 recorded as described previously (Haga et al., 2015). The VENUS signal  
671 intensity was quantified with Fiji software (Schindelin et al., 2012). To prepare  
672 hypocotyl cross sections, the *rpt2* mutant transformed with a  
673 *RPT2pro:RPT2-VENUS* gene were irradiated with blue light at  $10 \mu\text{mol m}^{-2} \text{s}^{-1}$   
674 for 6 h, subsequently mounted in 2% agarose and hand-sectioned with a blade.

675

## 676 **Transcriptional Analysis by qRT-PCR**

677 Total RNA was extracted using a RNeasy kit (QIAGEN). Quantitative RT-PCR  
678 was carried out using a PCR system (StepOne; Applied Biosystems) and the  
679 Luna One-Step RT-qPCR Kit (NEB) in accordance with the manufacturer's  
680 protocol. Triplicate PCR reactions were performed in each case and three  
681 biological independent samples were used for each gene. The primers used are  
682 listed in Supplemental Table S2 and *18S rRNA* was amplified as an internal



683 standard.

684

685 **Measurement of Phototropic Curvature**

686 Phototropic curvatures of hypocotyls were measured on agar medium in 0.2 ml

687 tubes using the “advanced method” described previously (Haga et al. 2012; Haga

688 and Kimura, 2019).

689 **Accession Numbers**

690 The sequence data for this article can be found in the Arabidopsis Genome  
691 Initiative or the EMBL/GenBank data libraries under the following accession  
692 numbers: *RPT2* (AT2G30520), *PHOT1* (AT3G45780), *NPH3* (AT5G64330),  
693 *PHOT2* (AT5G58140) and *UBQ3* (AT5G03240).

694

695 **Supplemental Data**

696

697 **Supplemental Figure 1.** Time course analysis of continuous light-induced  
698 phototropism in the *phot1 phot2* double mutants transformed with a  
699 *35Spro:PHOT1<sup>LOV1Cys39Ala</sup>* gene.

700

701 **Supplemental Figure 2.** Time course analysis of phot1 autophosphorylation in  
702 tube-grown seedlings.

703

704 **Supplemental Figure 3.** The effect of phosphatase on the *rpt2*-induced mobility  
705 shift of PHOT1 during Phos-tag SDS-PAGE.

706

707 **Supplemental Figure 4.** Evaluation of anti-PHOT2 antibody.

708

709 **Supplemental Figure 5.** Binding activity of phot2 to RPT2.

710

711 **Supplemental Figure 6.** Characterization of the *rpt2* mutants transformed with a  
712 *pMDC7-RPT2* construct.

713

714 **Supplemental Figure 7.** Suppression of *phot1* dephosphorylation by protein  
715 phosphatase inhibitors.

716

717 **Supplemental Figure 8.** Effect of the proteasome inhibitor MG132 on RPT2  
718 protein expression in wild-type seedlings under red light conditions.

719

720 **Supplemental Figure 9.** Phenotypes of the *35Spro:UBQ3* transgenic lines.

721

722 **Supplemental Table 1.** Gene-specific primers used for construction.

723

724 **Supplemental Table 2.** Gene-specific primers used for qRT-PCR.

725

## 726 **Acknowledgments**

727 We thank the Arabidopsis Biological Resource Center for providing the *phot1*

728 (Salk146058) and *phot2* (Salk142275) seeds. We also thank Professor John

729 Christie (University of Glasgow, Glasgow, UK) for kindly providing the seeds of

730 the *35Spro:PHOT1<sup>LOV1C39A</sup>* transgenic line, Professor Nam-Hai Chua

731 (Rockefeller University, New York, NY) for generously donating the pMDC7

732 vector, and Dr. Masatoshi Yamaguchi (Saitama University, Saitama, Japan) and

733 Professor Taku Demura (Nara Institute of Science and Technology) for  
734 generously supplying the pH35GS binary vectors. This work was supported by  
735 the Japan Society for the Promotion of Science (KAKENHI 22570058, 25120710,  
736 16H01231, 17H03694, 18K19329 to T.S.).

737

### 738 **Author Contributions**

739 T.K, T.T.-M. and T.S. designed and conducted most of the research, and analyzed  
740 the data. H.I., K.O. and K.I. designed and performed the phot1 in vitro  
741 phosphorylation assay. T.K. and T.S. wrote the article.

742

743 **REFERENCES**

- 744 Alonso, J.M., Stepanova, A.N., Leisse, T.J., Kim, C.J., Chen, H., Shinn, P.,  
745 Stevenson, D.K., Zimmerman, J., Barajas, P., Cheuk, R., Gadrinab, C., Heller,  
746 C., Jeske, A., Koesema, E., Meyers, C.C., Parker, H., Prednis, L., Ansari, Y.,  
747 Choy, N., Deen, H., Geralt, M., Hazari, N., Hom, E., Karnes, M., Mulholland,  
748 C., Ndubaku, R., Schmidt, I., Guzman, P., Aguilar-Henonin, L., Schmid, M.,  
749 Weigel, D., Carter, D.E., Marchand, T., Risseeuw, E., Brogden, D., Zeko, A.,  
750 Crosby, W.L., Berry, C.C., and Ecker, J.R. (2003). Genome-Wide Insertional  
751 Mutagenesis of *Arabidopsis thaliana*. *Science* 301: 653-657.
- 752 Ausubel, F.M., Brent, R., Kingston, R.E., Moore, D.D., Seidman, J.G., Smith,  
753 J.A., and Struhl, K. (2001). *Current Protocols in Molecular Biology*. New York,  
754 NY: John Wiley & Sons.
- 755 Casal, J.J., Candia, A.N., and Sellaro, R. (2014). Light perception and signaling  
756 by phytochrome A. *Journal of Experimental Botany* 65: 2835-2845.
- 757 Christie, J.M., Reymond, P., Powell, G.K., Bernasconi, P., Raibekas, A.A.,  
758 Liscum, E., and Briggs, W.R. (1998). *Arabidopsis* NPH1: a flavoprotein with  
759 the properties of a photoreceptor for phototropism. *Science* 282: 1698-1701.
- 760 Christie, J.M., Swartz, T.E., Bogomolni, R.A., and Briggs, W.R. (2002).  
761 Phototropin LOV domains exhibit distinct roles in regulating photoreceptor  
762 function. *The Plant Journal* 32: 205-219.
- 763 Christie, J.M. (2007). Phototropin blue-light receptors. *The Annual Review of*  
764 *Plant Biology* 58: 21-45.

- 765 Clough, R.C., and Vierstra, R.D. (1997). Phytochrome degradation. *Plant, Cell &*  
766 *Environment* 20: 713-721.
- 767 Curtis, M.D., and Grossniklaus, U. (2003). A gateway cloning vector set for  
768 high-throughput functional analysis of genes in planta. *Plant Physiol*  
769 133:462-469.
- 770 de Wit, M., Galvão, V.C., and Fankhauser, C. (2016). Light-Mediated Hormonal  
771 Regulation of Plant Growth and Development. *Annual Review of Plant Biology*  
772 67: 513-537.
- 773 Genschik, P., Sumara, I., and Lechner, E. (2013). The emerging family of  
774 CULLIN3-RING ubiquitin ligases (CRL3s): cellular functions and disease  
775 implications. *The EMBO Journal* 32: 2307-2320.
- 776 Haga, K., and Kimura, T. (2019). Physiological Characterization of Phototropism  
777 in *Arabidopsis* seedlings. In *Method in Molecular Biology 1924 Phototropism*,  
778 Yamamoto, K. T. ed (New York, USA: Human Press), pp. 3-17.
- 779 Haga, K., and Sakai, T. (2012). PIN auxin efflux carriers are necessary for  
780 pulse-induced but not continuous light-induced phototropism in *Arabidopsis*.  
781 *Plant Physiol.* 160: 763-776.
- 782 Haga, K., Tsuchida-Mayama, T., Yamada, M., and Sakai, T. (2015). *Arabidopsis*  
783 ROOT PHOTOTROPISM2 Contributes to the Adaptation to High-Intensity  
784 Light in Phototropic Responses. *The Plant Cell.* 27: 1098-1112.
- 785 Harada, A., Takemiya, A., Inoue, S., Sakai, T., and Shimazaki, K. (2013). Role of  
786 RPT2 in leaf positioning and flattening and a possible inhibition of phot2

- 787 signaling by phot1. *Plant & Cell Physiology* 54: 36-47.
- 788 Harper, S.M., Christie, J.M., and Gardner, K.H. (2004). Disruption of the LOV-J $\alpha$   
789 helix interaction activates phototropin kinase activity. *Biochemistry* 43:  
790 16184-16192.
- 791 Inada, S., Ohgishi, M., Mayama, T., Okada, K., and Sakai, T. (2004). RPT2 is a  
792 signal transducer involved in phototropic response and stomatal opening by  
793 association with phototropin 1 in *Arabidopsis thaliana*. *The Plant Cell* 16:  
794 886-897.
- 795 Kagawa, T., Sakai, T., Suetsugu, N., Oikawa, K., Ishiguro, S., Kato, T., Tabata,  
796 S., Okada, K., and Wada, M. (2001). *Arabidopsis* NPL1: a phototropin  
797 homolog controlling the chloroplast high-light avoidance response. *Science*  
798 291: 2138-2141.
- 799 Kaiserli, E., Sullivan, S., Jones, M.A., Feeney, K.A., and Christie, J.M. (2009).  
800 Domain swapping to assess the mechanistic basis of Arabidopsis phototropin  
801 1 receptor kinase activation and endocytosis by blue-light. *Plant Cell*. 21:  
802 3226-3244.
- 803 Kinoshita, T., Doi, M., Suetsugu, N., Kagawa, T., Wada, M., and Shimazaki, K.  
804 (2001). Phot1 and phot2 mediate blue light regulation of stomatal opening.  
805 *Nature* 414: 656-660.
- 806 Kinoshita, E., and Kinoshita-Kikuta, E. (2011). Improved Phos-tag SDS-PAGE  
807 under neutral pH conditions for advanced protein phosphorylation profiling.  
808 *Proteomics* 11: 319-323.

- 809 Li, J., Li, G., Wang, H., and Deng, X.Q. (2011). Phytochrome signaling  
810 mechanism. *The Arabidopsis Book* e0148.
- 811 Lin, C., Yang, H., Guo, H., Mockler, T., Chen, J., and Cashmore, A.R. (1998).  
812 Enhancement of blue-light sensitivity of Arabidopsis seedlings by a blue light  
813 receptor cryptochrome 2. *Proceedings of the National Academy of Sciences of*  
814 *the United States of America* 95: 2686-2690.
- 815 Liscum, E., and Briggs, W.R. (1995). Mutations in the *NPH1* locus of Arabidopsis  
816 disrupt the perception of phototropic stimuli. *The Plant Cell* 7: 473-485.
- 817 Motchoulski, A., and Liscum, E. (1999). *Arabidopsis* NPH3: A NPH1  
818 photoreceptor-interacting protein essential for phototropism. *Science* 286:  
819 961-964.
- 820 Nagashima, A., Suzuki, G., Uehara, Y., Saji, K., Furukawa, T., Koshiba, T.,  
821 Sekimoto, M., Fujioka, S., Kuroha, T., Kojima, M., Sakakibara, H., Fujisawa,  
822 N., Okada, K., and Sakai, T. (2008). Phytochromes and cryptochromes  
823 regulate the differential growth of Arabidopsis hypocotyls in both a  
824 PGP19-dependent and -independent manner. *The Plant Journal* 53, 516-529.
- 825 Nakasako, M., Iwata, T., Matsuoka, D., and Tokutomi, S. (2004). Light-induced  
826 structural changes of LOV domain-containing polypeptides from *Arabidopsis*  
827 phototropin 1 and 2 studied by small-angle X-ray scattering. *Biochemistry* 43:  
828 14881-14890.
- 829 Ohgishi, M., Saji, K., Okada, K., and Sakai, T. (2004). Functional analysis of each  
830 blue-light receptor, cry1, cry2, phot1, and phot2, by using combinatorial



831 multiple mutants in *Arabidopsis*. *Proceedings of the National Academy of*  
832 *Sciences of the United States of America* 101: 2223-2228.

833 Okajima, K., Kashojiya, S., and Tokutomi, S. (2012). Photosensitivity of kinase  
834 activation by blue-light involves the lifetime of a cysteinyl-flavin adduct  
835 intermediate, S390, in the photoreaction cycle of the LOV2 domain in  
836 phototropin, a plant blue-light receptor. *Journal of Biological Chemistry* 287:  
837 40972-40981.

838 Okajima, K. (2016). Molecular mechanism of phototropin light signaling. *Journal*  
839 *of Plant Research* 129: 159-166.

840 Pedmale, U.V., and Liscum, E. (2007). Regulation of phototropic signaling in  
841 *Arabidopsis* via phosphorylation state changes in the phototropin 1-interacting  
842 protein NPH3. *Journal of Biological Chemistry* 282: 19992-20001.

843 Petersen, J., Inoue, S.I., Kelly, S.M., Sullivan, S., Kinoshita, T., and Christie, J.M.  
844 (2017). Functional characterization of a constitutively active kinase variant of  
845 *Arabidopsis* phototropin 1. *Journal of Biological Chemistry* 292: 13843-13852.

846 Rademacher, E.H., and Offringa, R. (2012). Evolutionary Adaptations of Plant  
847 AGC Kinases: From Light Signaling to Cell Polarity Regulation. *Frontiers in*  
848 *Plant Science* 3: 250.

849 Roberts, D., Pedmale, U.V., Morrow, J., Sachdev, S., Lechner, E., Tang, X.,  
850 Zheng, N., Hannink, M., Genschik, P., and Liscum, E. (2011). Modulation of  
851 phototropic responsiveness in *Arabidopsis* through ubiquitination of  
852 phototropin 1 by the CUL3-Ring E3 ubiquitin ligase CRL3 (NPH3). *The Plant*

- 853 *Cell* 23: 3627-3640.
- 854 Sakai, T., Wada, T., Ishiguro, S., and Okada, K. (2000). RPT2. A signal  
855 transducer of the phototropic response in *Arabidopsis*. *The Plant Cell* 12:  
856 225-236.
- 857 Sakai, T., Kagawa, T., Kasahara, M., Swartz, T.E., Christie, J.M., Briggs, W.R.,  
858 Wada, M., and Okada, K. (2001). *Arabidopsis* nph1 and npl1: blue-light  
859 receptors that mediate both phototropism and chloroplast relocation.  
860 *Proceedings of the National Academy of Science of America* 98: 6969-6974.
- 861 Sakai, T. (2005). NPH3 and RPT2: signal transducers in phototropin signaling  
862 pathways. In *Light Sensing in Plants*, Wada M, Shimazaki K, Iino M eds  
863 (Tokyo, Japan: Springer-Verlag), pp. 179-184.
- 864 Sakamoto, K., and Briggs, W.R. (2002). Cellular and subcellular localization of  
865 phototropin 1. *The Plant Cell* 14: 1723-1735.
- 866 Schindelin, J., Arganda-Carreras, I., Frise, E., Kaynig, V., Longair, M., Pietzsch,  
867 T., Preibisch, S., Rueden, C., Saalfeld, S., Schmid, B., et al. (2012) Fiji: An  
868 open-source platform for biological-image analysis. *Nat Methods* 9: 676–68
- 869 Sharrock, R.A., and Clack, T. (2002). Patterns of expression and normalized  
870 levels of the five *Arabidopsis* phytochromes. *Plant Physiology* 130: 442-456.
- 871 Sullivan, S., Thomson, C.E., Lamont, D.J., Jones, M.A., and Christie, J.M.  
872 (2008). In vivo phosphorylation site mapping and functional characterization of  
873 *Arabidopsis* phototropin 1. *Molecular Plant* 1: 178-194.
- 874 Sullivan, S., Kharshiing, E., Laird, J., Sakai, T., and Christie, J.M. (2019).

875 Deetiolation Enhances Phototropism by Modulating NON-PHOTOTROPIC  
876 HYPOCOTYL3 Phosphorylation Status. *Plant Physiology* 180: 1119-1131.

877 Suetsugu, N., Takemiya, A., Kong, S.G., Higa, T., Komatsu, A., Shimazaki, K.,  
878 Kohchi, T., and Wada, M. (2016). RPT2/NCH1 subfamily of NPH3-like proteins  
879 is essential for the chloroplast accumulation response in land plants.  
880 *Proceedings of the National Academy of Science of America* 113:  
881 10424-10429.

882 Suzuki, H., Koshihara, T., Fujita, C., Yamauchi, Y., Kimura, T., Isobe, T., Sakai, T.,  
883 Taoka, M, and Okamoto, T. (2019). Low-fluence blue light-induced  
884 phosphorylation of Zmphot1 mediates the first positive phototropism. *Journal*  
885 *of Experimental Botany* in press.

886 Tsuchida-Mayama, T., Nakano, M., Uehara, Y., Sano, M., Fujisawa, N., Okada,  
887 K., and Sakai, T. (2008). Mapping of the phosphorylation sites on the  
888 phototropic signal transducer, NPH3. *Plant Science* 174: 626-633.

889 Tsuchida-Mayama, T., Sakai, T., Hanada, A., Uehara, Y., Asami, T., and  
890 Yamaguchi, S. (2010). Role of the phytochrome and cryptochrome signaling  
891 pathways in hypocotyl phototropism. *The Plant Journal* 62: 653-662.

892 Xue, Y., Xing, J., Wan, Y., Lv, X., Fan, L., Zhang, Y., Song, K., Wang, L., Wang,  
893 X., Deng, X., Baluška, F., Christie, J.M., and Lin, J. (2018). *Arabidopsis*  
894 Blue-light Receptor Phototropin 1 Undergoes Blue-light-Induced Activation in  
895 Membrane Microdomains. *Molecular Plant* 11: 846-859.

896 Zuo, J., Niu, Q.W., and Chua, N.H. (2000). An estrogen receptor-based

897 transactivator XVE mediates highly inducible gene expression in transgenic  
898 plants. *The Plant Journal* 24: 265-273.  
899

900 **Figure legends**

901

902 **Figure 1.** Interaction between phot1 and RPT2.

903 **(A)** Schematic representation of the phot1 structure. The Ser/Thr protein kinase  
904 and LOV domains are denoted by the solid and dotted blocks, respectively. The  
905 amino acid residues used for each underlined construct are indicated in  
906 parentheses.

907 **(B)** Yeast two-hybrid assay of phot1–RPT2 interactions. Solution assays of  
908  $\beta$ -galactosidase ( $\beta$ -Gal) activity were performed for the combinations indicated on  
909 the left. The data shown are mean values  $\pm$  SE ( $n = 3$ ). The asterisk denotes  
910 statistically significant differences compared with the vector control (Student's  $t$   
911 test;  $P < 0.05$ ).

912 **(C)** In vitro pull-down assay to verify the interaction between the LOV domains of  
913 phot1 and the N-terminal half of RPT2. HA-tagged proteins of the N-terminal half  
914 of RPT2 (HA-RPT2 N) were incubated with the His-tagged LOV1 or LOV2  
915 domains of phot1 for the His-tag pull-down assay and detected by  
916 immunoblotting using an anti-HA ( $\alpha$ -HA) antibodies. HA-RPT2 N proteins without  
917 pull down were also electrophoresed as a control (Input). The protein-blotted  
918 membrane was stained using a Pierce reversible protein staining kit.

919

920 **Figure 2.** RPT2 suppresses the autophosphorylation of phot1.

921 **(A)** Immunoblotting analysis of PHOT1 in wild type (Col) and *rpt2* mutant

922 *Arabidopsis*. Two-day-old etiolated seedlings were irradiated with unilateral blue  
923 light at the indicated fluence rates for 2 h. Total proteins (20  $\mu\text{g}$ ) extracted from  
924 the seedlings were separated on 6% SDS-PAGE gels with 2  $\mu\text{M}$  Phos-tag (+  
925 Phos-tag), followed by immunoblotting with anti-PHOT1 ( $\alpha$ -PHOT1) antibodies.  
926 10  $\mu\text{g}$  of the total proteins were separated on 6% SDS-PAGE gels without  
927 Phos-tag (– Phos-tag) for comparison. An asterisk indicates a non-specific band.  
928 The protein-blotted membranes were stained as a loading control.

929 **(B and C)** Time courses analysis of phot1 autophosphorylation. Two-day-old  
930 etiolated seedlings were irradiated with unilateral blue light at 100  $\mu\text{mol m}^{-2} \text{s}^{-1}$  in  
931 **(B)** or 0.1  $\mu\text{mol m}^{-2} \text{s}^{-1}$  in **(C)** for the indicated times. Other details are as  
932 described in **(A)**.

933 **(D)** Immunoblotting analysis of PHOT2 in wild type (Col) and *rpt2* mutant.  
934 Immunoblotting was performed with an anti-PHOT2 ( $\alpha$ -PHOT2) antibodies. Other  
935 details were as in **(A)**.

936 **(E)** Time course analysis of phot2 autophosphorylation. Two-day-old etiolated  
937 seedlings were irradiated with unilateral blue light at 100  $\mu\text{mol m}^{-2} \text{s}^{-1}$  for the  
938 indicated times. Immunoblotting was performed with  $\alpha$ -PHOT2 and anti-RPT2  
939 ( $\alpha$ -RPT2) antibodies. Other details are as described in **(A)**.

940 **(F)** Autophosphorylation of phot1 and phot2 in the *rpt2* mutants transformed with  
941 a *35Spro:RPT2* gene (*35Spro:RPT2*). Two-day-old etiolated seedlings were  
942 irradiated with unilateral blue light at 100  $\mu\text{mol m}^{-2} \text{s}^{-1}$  for 30 minutes.  
943 Immunoblotting was performed with  $\alpha$ -PHOT1,  $\alpha$ -PHOT2 and  $\alpha$ -RPT2

944 antibodies. Other details are as described in **(A)**.

945

946 **Figure 3.** In vitro blue light-induced phosphorylation of a 120-kDa protein in  
947 microsomal membranes.

948 Two-day-old etiolated *rpt2* mutants transformed with a *pMDC7-RPT2* construct  
949 (*pMDC7-RPT2*) or wild-type seedlings transformed with a *pER8* vector control  
950 (*pER8*) were grown on agar medium with (–) or without (+) 10  $\mu$ M estradiol (Est)  
951 under darkness. Microsomal proteins were then extracted.

952 **(A)** In vitro blue light-induced phosphorylation of a 120-kDa protein in microsomal  
953 membranes. Microsomal proteins were irradiated with mock (BL –) or blue light  
954 (BL +) at 10  $\mu$ mol  $\text{m}^{-2} \text{s}^{-1}$  for 16 min in the presence of  $\gamma$ - $^{32}\text{P}$ -ATP. The reacted  
955 samples were resolved on 6% SDS-PAGE gels and autoradiographed.

956 **(B)** Relative quantity of phosphorylated 120-kDa proteins. The value was  
957 calculated against the data from Est-untreated, blue light-irradiated  
958 *pMDC7-RPT2* seedlings. The data shown are mean values  $\pm$  SE ( $n = 3$ ). An  
959 asterisk indicates a statistically significant difference (Student's t test;  $P < 0.05$ ).

960

961 **Figure 4.** Effects of protein phosphatase inhibitors on the phosphorylation status  
962 of phot1.

963 The aerial parts of two-day-old etiolated seedlings were incubated under  
964 darkness for 2 h in liquid medium with a protein phosphatase inhibitor (PPase  
965 inhibitor), 30  $\mu$ M cantharidin (CN) or 1  $\mu$ M okadaic acid (OKA), and subsequently

966 treated with blue light at  $0.1 \mu\text{mol m}^{-2} \text{s}^{-1}$  for 0.5 h. Total proteins (15  $\mu\text{g}$  for **A**, 20  
967  $\mu\text{g}$  for **B**) extracted from the seedlings were separated on 6% SDS-PAGE gels  
968 with 2  $\mu\text{M}$  Phos-tag, followed by immunoblotting with  $\alpha$ -PHOT1 antibodies.  
969 Protein-blotted membranes were stained as a loading control.

970 **(A)** Effects of PPase inhibitors on the aerial parts of wild-type (Col) seedlings and  
971 *rpt2* mutants. Red light pretreatments were conducted to induce RPT2  
972 expression before exposure to the PPase inhibitor.

973 **(B)** Effects of PPase inhibitors on the aerial parts of wild-type (Col) seedlings and  
974 the *35Spro:RPT2* lines (OX).

975

976 **Figure 5.** Expression patterns of the *RPT2pro:GUS* and the  
977 *RPT2pro:RPT2-VENUS* genes.

978 Two-day-old etiolated seedlings were mock-irradiated (Mock: **A, D, G, J, M, P**),  
979 or red light- (RL: **B, E, H, K, N, Q**) or blue light- (BL: **C, F, I, L, O, R**) irradiated at  
980  $10 \mu\text{mol m}^{-2} \text{s}^{-1}$  for 4 h. Scale bars: 1.0 mm (**A-C, J-L**); 400  $\mu\text{m}$  (**D-F, M-O**); 100  
981  $\mu\text{m}$  (**G-I, P-R**).

982 **(A-I)** GUS staining patterns of wild-type seedlings transformed with a  
983 *RPT2pro:GUS* gene.

984 **(J-R)** VENUS fluorescent images of the *rpt2* mutants transformed with a  
985 *RPT2pro:RPT2-VENUS* gene.

986 **(S)** Signal intensities of RPT2-VENUS fluorescence. Fluorescent signals were  
987 measured in the upper region of the hypocotyls and calculated relative to the



988 value from BL-irradiated seedlings. The data shown are the mean values  $\pm$  SE  
989 from 9 seedlings. Asterisks indicate a statistically significant difference (Student's  
990 t test;  $P < 0.01$ ).

991

992 **Figure 6.** Post-transcriptional regulation of RPT2 expression by phototropins.

993 **(A)** Immunoblotting analysis of RPT2 proteins in wild type (Col), *phot1* and *nph3*  
994 seedlings. Two-day-old etiolated seedlings were mock-irradiated (Mock), or red  
995 light- (RL) or blue light- (BL) irradiated at  $10 \mu\text{mol m}^{-2} \text{s}^{-1}$  for 6 h. Total proteins  
996 (10  $\mu\text{g}$ ) extracted from the seedlings were resolved on 10% SDS-PAGE gels,  
997 followed by immunoblotting with  $\alpha$ -RPT2 antibodies. The protein-blotted  
998 membranes were stained as a loading control.

999 **(B)** Statistical analysis of the data in **(A)**. The values were normalized with a  
1000 loading control and then calculated against the data from the blue light-irradiated  
1001 seedlings of wild type. The data shown are mean values  $\pm$  SE ( $n = 3$ ). Asterisks  
1002 indicate a statistically significant difference (Student's t test;  $P < 0.05$ ).

1003 **(C)** qRT-PCR analysis of *RPT2* in wild type (Col), *phot1* and *nph3* seedlings.  
1004 Two-day-old etiolated seedlings were irradiated with blue light at  $10 \mu\text{mol m}^{-2} \text{s}^{-1}$   
1005 for 6 h or mock-irradiated. The values were normalized using an internal control  
1006 (*18S rRNA*) and then calculated against the values from blue light-irradiated  
1007 seedlings of wild type. The data shown are the mean values  $\pm$  SE ( $n = 3$ ).

1008 **(D)** Immunoblotting analysis of PHOT1, RPT2 and NPH3 in the *phot1* mutants  
1009 transformed with a *pMDC7-PHOT1<sup>1608E</sup>* construct (*pMDC7-PHOT1<sup>1608E</sup>*: two

1010 independent lines, #1 and #2) and the *pER8* vector control line. Two-day-old  
1011 etiolated seedlings were grown on agar medium with (+) or without (-) 10  $\mu\text{M}$   
1012 estradiol (Est). Microsomal proteins (7.5  $\mu\text{g}$ ) extracted from the seedlings were  
1013 separated on 7.5% SDS-PAGE gels, followed by immunoblotting with  $\alpha$ -PHOT1,  
1014  $\alpha$ -RPT2 and anti-NPH3 ( $\alpha$ -NPH3) antibodies. The protein-blotted membranes  
1015 were stained as a loading control.

1016 **(E)** Fluence-rate dependency of the RPT2 induction in wild type (Col), *phot1* and  
1017 *phot1 phot2* double mutants. Two-day-old etiolated seedlings were irradiated with  
1018 blue light at the indicated fluence rate for 6 h. Other details were as described in  
1019 **(A)**.

1020 **(F)** Time course analysis of RPT2 induction in wild type (Col) and *phot1*  
1021 seedlings. Two-day-old etiolated seedlings were irradiated with blue light at 0.1  
1022 (left panel) or 10  $\mu\text{mol m}^{-2} \text{s}^{-1}$  (right panel) for the indicated period. Other details  
1023 were as described in **(A)**.

1024 **(G)** Statistical analysis of the data generated in **(F)**. The values were normalized  
1025 using a loading control and then calculated against the values from wild-type  
1026 seedlings irradiated for 2 h. The data shown are mean values  $\pm$  SE ( $n = 3$ ).  
1027 Asterisks indicate a statistically significant difference (Student's t test;  $P < 0.05$ ).

1028

1029 **Figure 7.** Distribution patterns of the RPT2-VENUS proteins in etiolated  
1030 hypocotyls.

1031 Two-day-old etiolated seedlings of the *rpt2* mutants transformed with a

1032 *RPT2pro::RPT2-VENUS* gene were irradiated with blue light (BL) at  $10 \mu\text{mol m}^{-2}$   
1033  $\text{s}^{-1}$  for 6 h from above **(A)** or for 2 h from the unilateral side **(B)**.

1034 **(A)** A typical distribution pattern of RPT2-VENUS in the hypocotyl cross section.  
1035 H, hypocotyl; C, cotyledon.

1036 **(B and C)** Distribution patterns of RPT2-VENUS in the upper region of the  
1037 hypocotyls. Distribution patterns were classified into three types (Irradiated side,  
1038 Even and Shaded side). Representative confocal (left panel), bright field (mid  
1039 panel) and merged images (right panel) are shown in **(B)**. Arrows indicate the  
1040 direction of blue light. The frequencies of each expression pattern were  
1041 calculated from 74 seedlings and are shown in **(C)**. White bar, 100  $\mu\text{m}$ .

1042

1043 **Figure 8.** Destabilization of the RPT2 protein via a ubiquitin-proteasome  
1044 dependent pathway.

1045 **(A)** Effect of the proteasome inhibitor MG132 on RPT2 protein expression.

1046 Two-day-old etiolated seedlings of wild type (Col) and *phot1 phot2* double mutant  
1047 were transferred into liquid medium with (+) or without (–) 50  $\mu\text{M}$  MG132, kept in  
1048 the dark for 1 h, and subsequently irradiated with blue light (BL) at  $10 \mu\text{mol m}^{-2} \text{s}^{-1}$   
1049 for 3 h (+) or mock-irradiated (–). Total proteins (10  $\mu\text{g}$ ) extracted from the  
1050 seedlings were separated on 7.5% SDS-PAGE gels, followed by immunoblotting  
1051 with  $\alpha$ -RPT2 antibodies. The protein-blotted membranes were stained as a  
1052 loading control.

1053 **(B)** Immunoblotting analysis of RPT2, PHOT1, PHOT2 and NPH3 in wild-type

1054 (Col) seedlings and wild-type seedlings transformed with *35Spro:UBQ3*  
1055 (*35Spro:UBQ3*: two independent lines; #1 and #2). Two-day-old etiolated  
1056 seedlings were mock-, red light- (RL) or blue light- (BL) irradiated at  $10 \mu\text{mol m}^{-2}$   
1057  $\text{s}^{-1}$  for 6 h. Total proteins (10  $\mu\text{g}$ ) extracted from the seedlings were then  
1058 separated on 10% SDS-PAGE gels, followed by immunoblotting with  $\alpha$ -RPT2,  
1059  $\alpha$ -PHOT2 and  $\alpha$ -NPH3 antibodies. The protein-blotted membranes were stained  
1060 as a loading control.

1061 **(C)** Hypocotyl phototropism in wild-type (Col) seedlings and *35Spro:UBQ3*  
1062 transgenic lines. Two-day-old etiolated seedlings were irradiated with unilateral  
1063 blue light at  $0.0017$  or  $0.17 \mu\text{mol m}^{-2} \text{s}^{-1}$  for 3 h, or  $10 \mu\text{mol m}^{-2} \text{s}^{-1}$  for 6 h. The  
1064 data shown are the mean values  $\pm$  SE for hypocotyl curvatures of 14-24  
1065 seedlings. Asterisks indicate a statistically significant difference (Student's t test;  
1066  $P < 0.05$ ).

1067

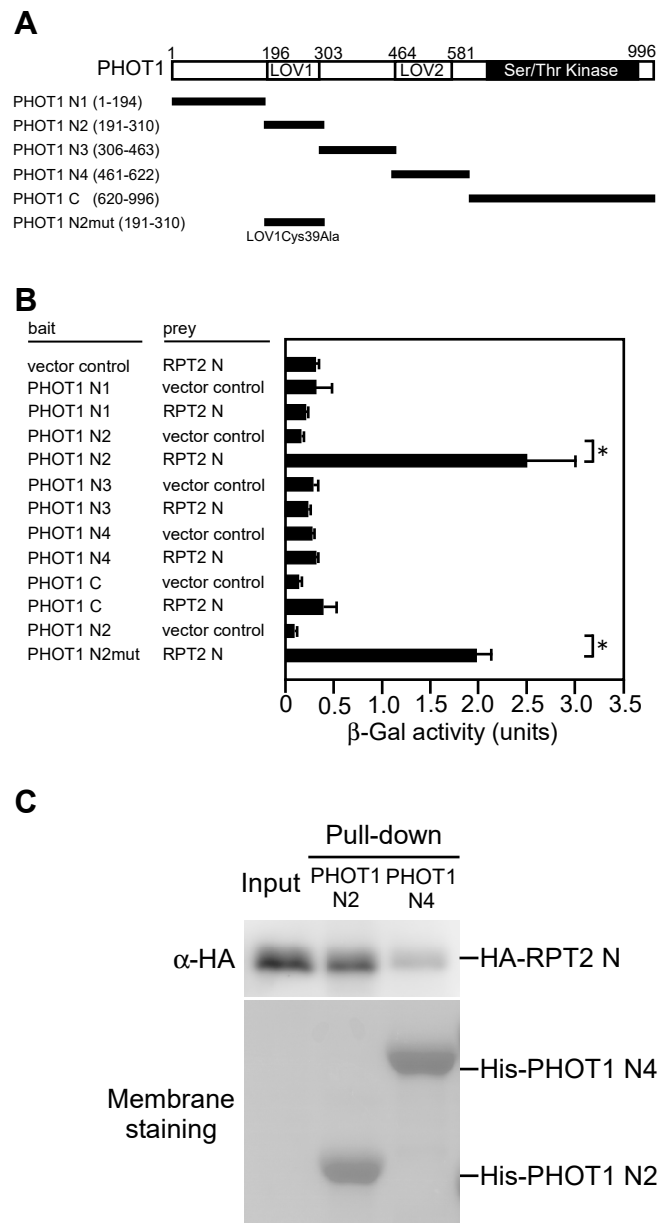

**Figure 1.** Interaction between phot1 and RPT2.

(A) Schematic representation of the phot1 structure. The Ser/Thr protein kinase and LOV domains are denoted by the solid and dotted blocks, respectively. The amino acid residues used for each underlined construct are indicated in parentheses.

(B) Yeast two-hybrid assay of phot1-RPT2 interactions. Solution assays of  $\beta$ -Gal activity were performed for the combinations indicated on the left. The data shown are means values  $\pm$  SE ( $n = 3$ ). The asterisk denotes statistically significant differences compared with the vector control (Student's *t* test;  $P < 0.05$ ).

(C) In vitro pull-down assay to verify the interaction between the LOV domains of phot1 and the N-terminal half of RPT2. HA-tagged proteins of N-terminal half of the RPT2 (HA-RPT2 N) were incubated with the His-tagged LOV1 or LOV2 domains of phot1 for His-tag pull-down assay and detected by immunoblotting using anti-HA ( $\alpha$ -HA) antibodies. The protein-blotted membrane were stained using a Pierce reversible protein staining kit.

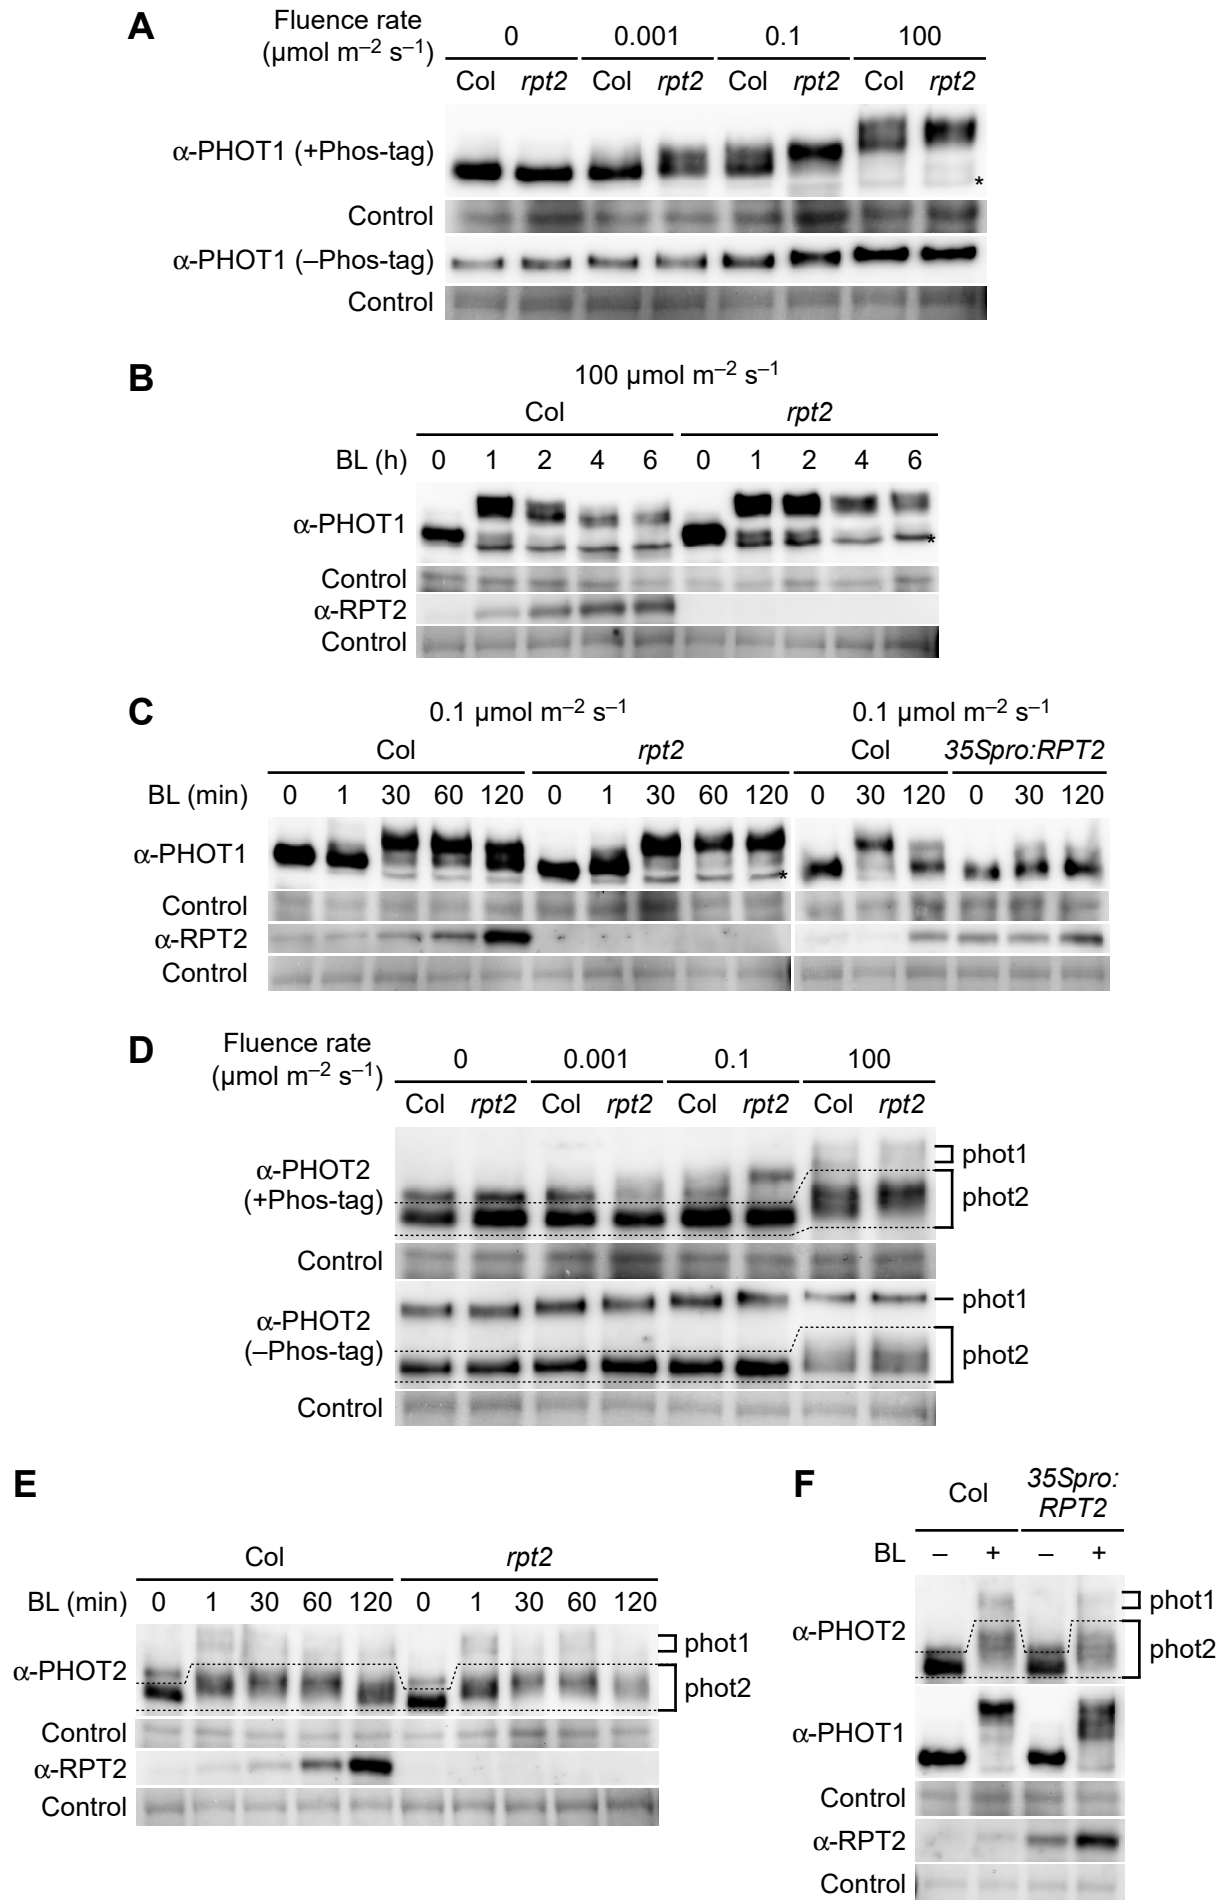

**Figure 2.** RPT2 suppresses the autophosphorylation of phot1.

**(A)** Immunoblotting analysis of PHOT1 in wild type (Col) and *rpt2* mutant *Arabidopsis*. Two-day-old etiolated seedlings were irradiated with unilateral blue light at the indicated fluence rates for 2 h. Total proteins (20  $\mu\text{g}$ ) extracted from the seedlings were separated on 6% SDS-PAGE gels with 2  $\mu\text{M}$  Phos-tag (+ Phos-tag), followed by immunoblotting with anti-PHOT1 ( $\alpha$ -PHOT1) antibodies. 10  $\mu\text{g}$  of the total proteins were separated on 6% SDS-PAGE gels without Phos-tag (– Phos-tag) for comparison. An asterisk indicates a non-specific band. The protein-blotted membranes were stained as a loading control.

**(B and C)** Time course analysis of phot1 autophosphorylation. Two-day-old etiolated seedlings were irradiated with unilateral blue light at 100  $\mu\text{mol m}^{-2} \text{s}^{-1}$  in **(B)** or 0.1  $\mu\text{mol m}^{-2} \text{s}^{-1}$  in **(C)** for the indicated times. Other details are as described in **(A)**.

**(D)** Immunoblotting analysis of PHOT2 in wild type (Col) and *rpt2* mutant. Immunoblotting was performed with an anti-PHOT2 antibody ( $\alpha$ -PHOT2) antibodies. Other details were as in **(A)**.

**(E)** Time course analysis of phot2 autophosphorylation. Two-day-old etiolated seedlings were irradiated with unilateral blue light at 100  $\mu\text{mol m}^{-2} \text{s}^{-1}$  for the indicated times. Immunoblotting was performed with  $\alpha$ -PHOT2 and anti-RPT2 ( $\alpha$ -RPT2) antibodies. Other details are as described in **(A)**.

**(F)** Autophosphorylation of phot1 and phot2 in the *rpt2* mutant transformed with a *35Spro:RPT2* gene (*35Spro:RPT2*). Two-day-old etiolated seedlings were irradiated with unilateral blue light at 100  $\mu\text{mol m}^{-2} \text{s}^{-1}$  for 30 minutes. Immunoblotting was performed with  $\alpha$ -PHOT1,  $\alpha$ -PHOT2 and  $\alpha$ -RPT2 antibodies. Other details are as described in **(A)**.

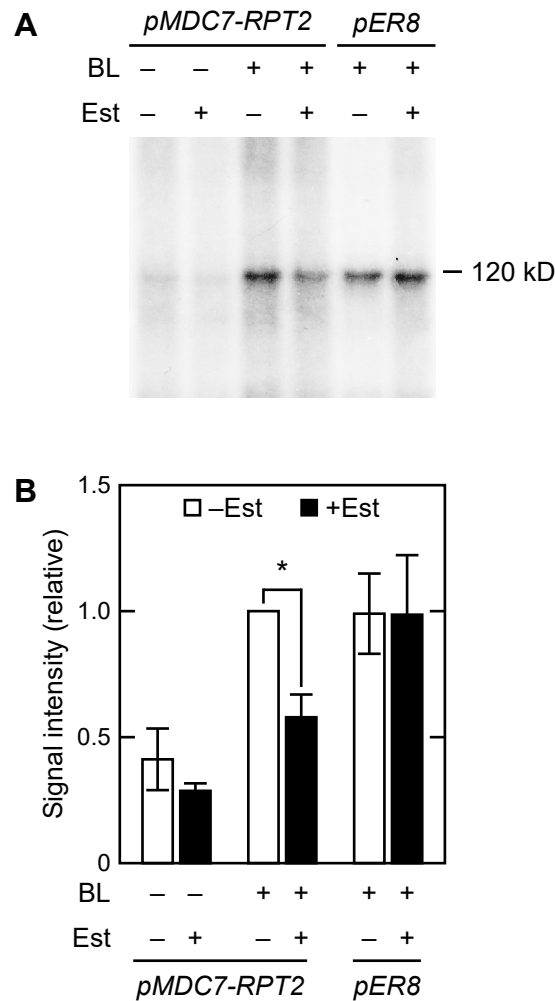

**Figure 3.** In vitro blue light-induced phosphorylation of a 120-kDa protein in microsomal membranes.

Two-day-old etiolated *rpt2* mutants transformed with a *pMDC7-RPT2* construct (*pMDC7-RPT2*) or wild-type seedlings transformed with a *pER8* vector control (*pER8*) were grown on agar medium with (–) or without (+) 10  $\mu$ M estradiol (Est) under darkness. Microsomal proteins were then extracted.

**(A)** In vitro blue light-induced phosphorylation of a 120-kDa protein in microsomal membranes. Microsomal proteins were irradiated with mock (BL –) or blue light (BL +) at 10  $\mu$ mol  $m^{-2} s^{-1}$  for 16 min in the presence of  $\gamma$ - $^{32}P$ -ATP. The reacted samples were resolved on 6% SDS-PAGE gels and autoradiographed.

**(B)** Relative quantify of phosphorylated 120-kDa proteins. The value was calculated against the data from Est-untreated, blue light-irradiated *pMDC7-RPT2* seedlings. The data shown are mean values  $\pm$  SE ( $n = 3$ ). An asterisk indicate a statistically significant difference (Student's t test;  $P < 0.05$ ).



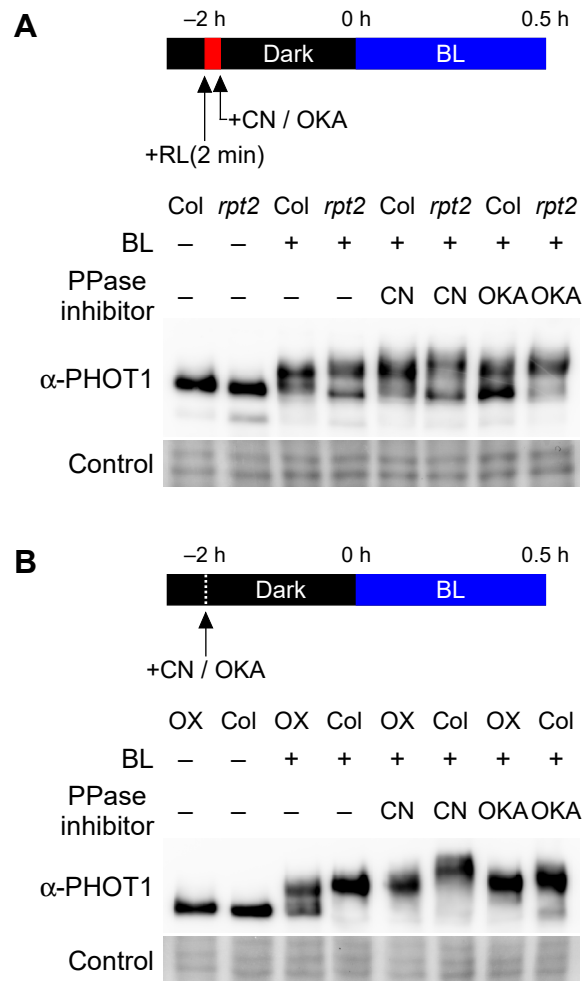

**Figure 4.** Effect of protein phosphatase inhibitors on phosphorylation status of phot1.

The aerial parts of two-day-old etiolated seedlings were incubated under darkness for 2 h in liquid medium with a protein phosphatase inhibitor (PPase inhibitor), 30  $\mu\text{M}$  cantharidin (CN) or 1  $\mu\text{M}$  okadaic acid (OKA), and subsequently treated with blue light at  $0.1 \mu\text{mol m}^{-2} \text{s}^{-1}$  for 0.5 h. Total proteins (15  $\mu\text{g}$  for **A**, 20  $\mu\text{g}$  for **B**) extracted from the seedlings were separated on 6% SDS-PAGE gels with 2  $\mu\text{M}$  Phos-tag, followed by immunoblotting with  $\alpha$ -PHOT1 antibodies. Protein-blotted membranes were stained as a loading control.

**(A)** Effect of PPase inhibitors on the aerial parts of wild-type (Col) seedlings and *rpt2* mutants. Red light pretreatments were conducted to induce RPT2 expression before exposure to the PPase inhibitors.

**(B)** Effect of PPase inhibitors on the aerial parts of wild-type (Col) seedlings and the *35Spro:RPT2* lines (OX).

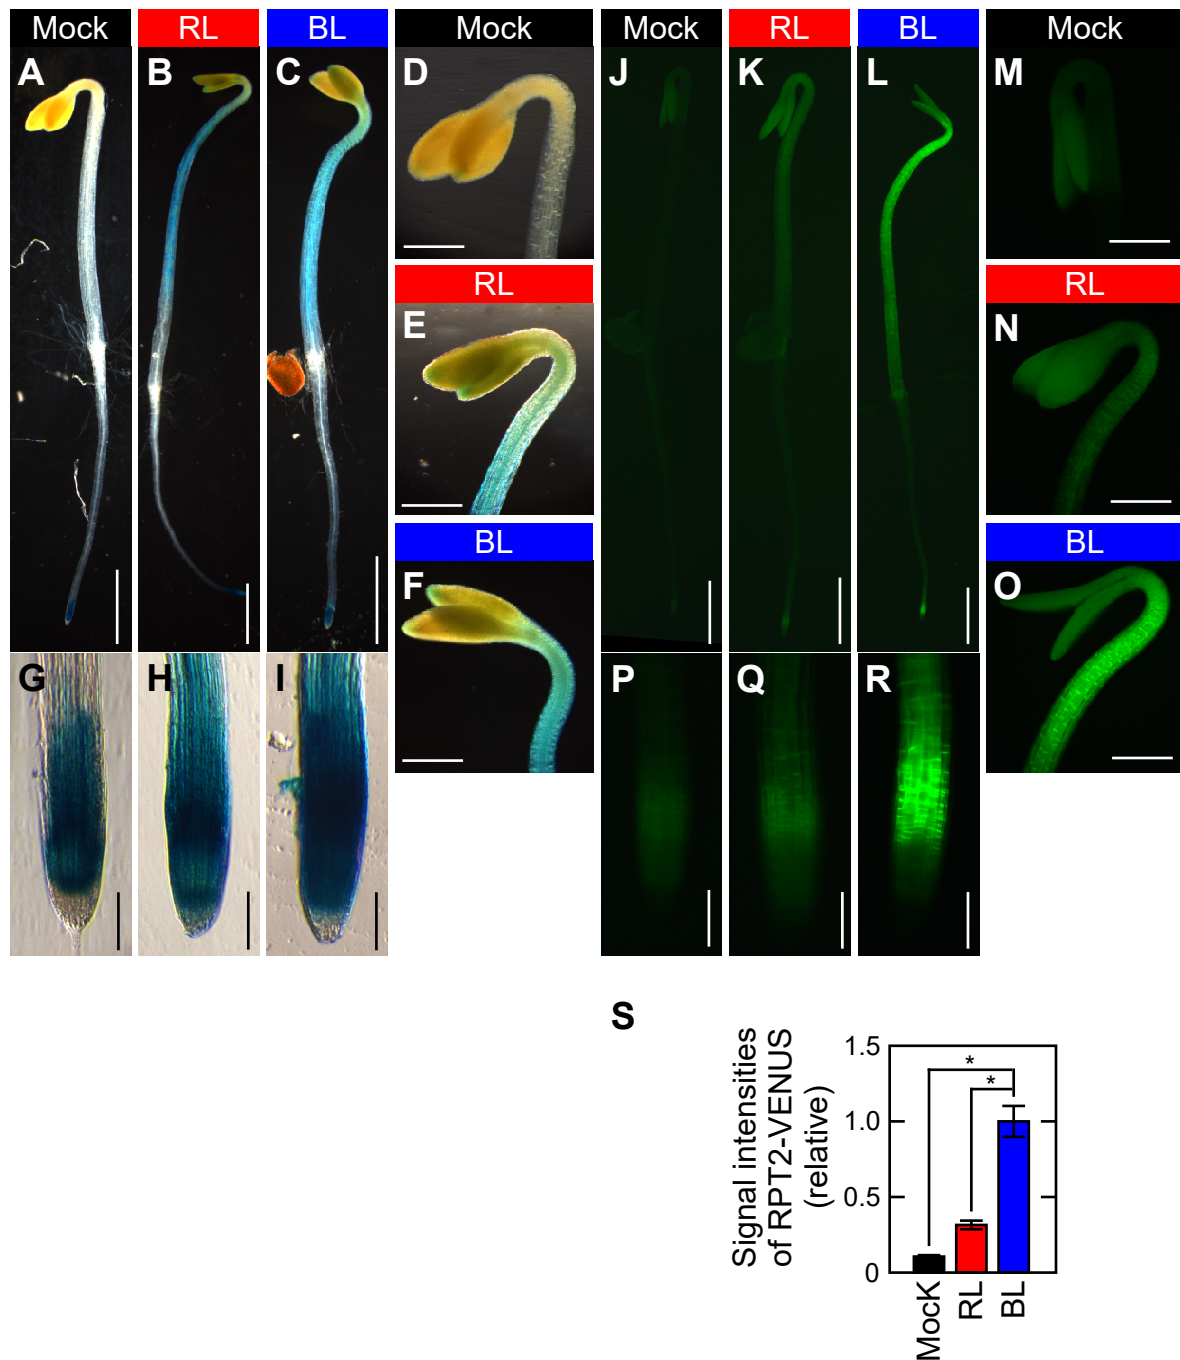

**Figure 5.** Expression patterns of the *RPT2pro:GUS* and the *RPT2pro:RPT2-VENUS* genes. Two-day-old etiolated seedlings were mock-irradiated (Mock: **A, D, G, J, M, P**), or red light- (RL: **B, E, H, K, N, Q**) or blue light- (BL: **C, F, I, L, O, R**) irradiated at  $10 \mu\text{mol m}^{-2} \text{s}^{-1}$  for 4 h. Scale bars: 1.0 mm (**A-C, J-I**); 400  $\mu\text{m}$  (**D-F, M-O**); 100  $\mu\text{m}$  (**G-I, P-R, U**). (**A-I**) GUS staining patterns of wild-type seedlings transformed with a *RPT2pro:GUS* gene. (**J-R**) VENUS fluorescent images of the *rpt2* mutants transformed with a *RPT2pro:RPT2-VENUS* gene. (**S**) Signal intensities of RPT2-VENUS fluorescence. Fluorescent signals were measured in the upper region of the hypocotyls and calculated relative to the value from BL-irradiated seedlings. The data shown are the mean values  $\pm$  SE from 9 seedlings. Asterisks indicate a statistically significant difference (Student's t test;  $P < 0.01$ ).

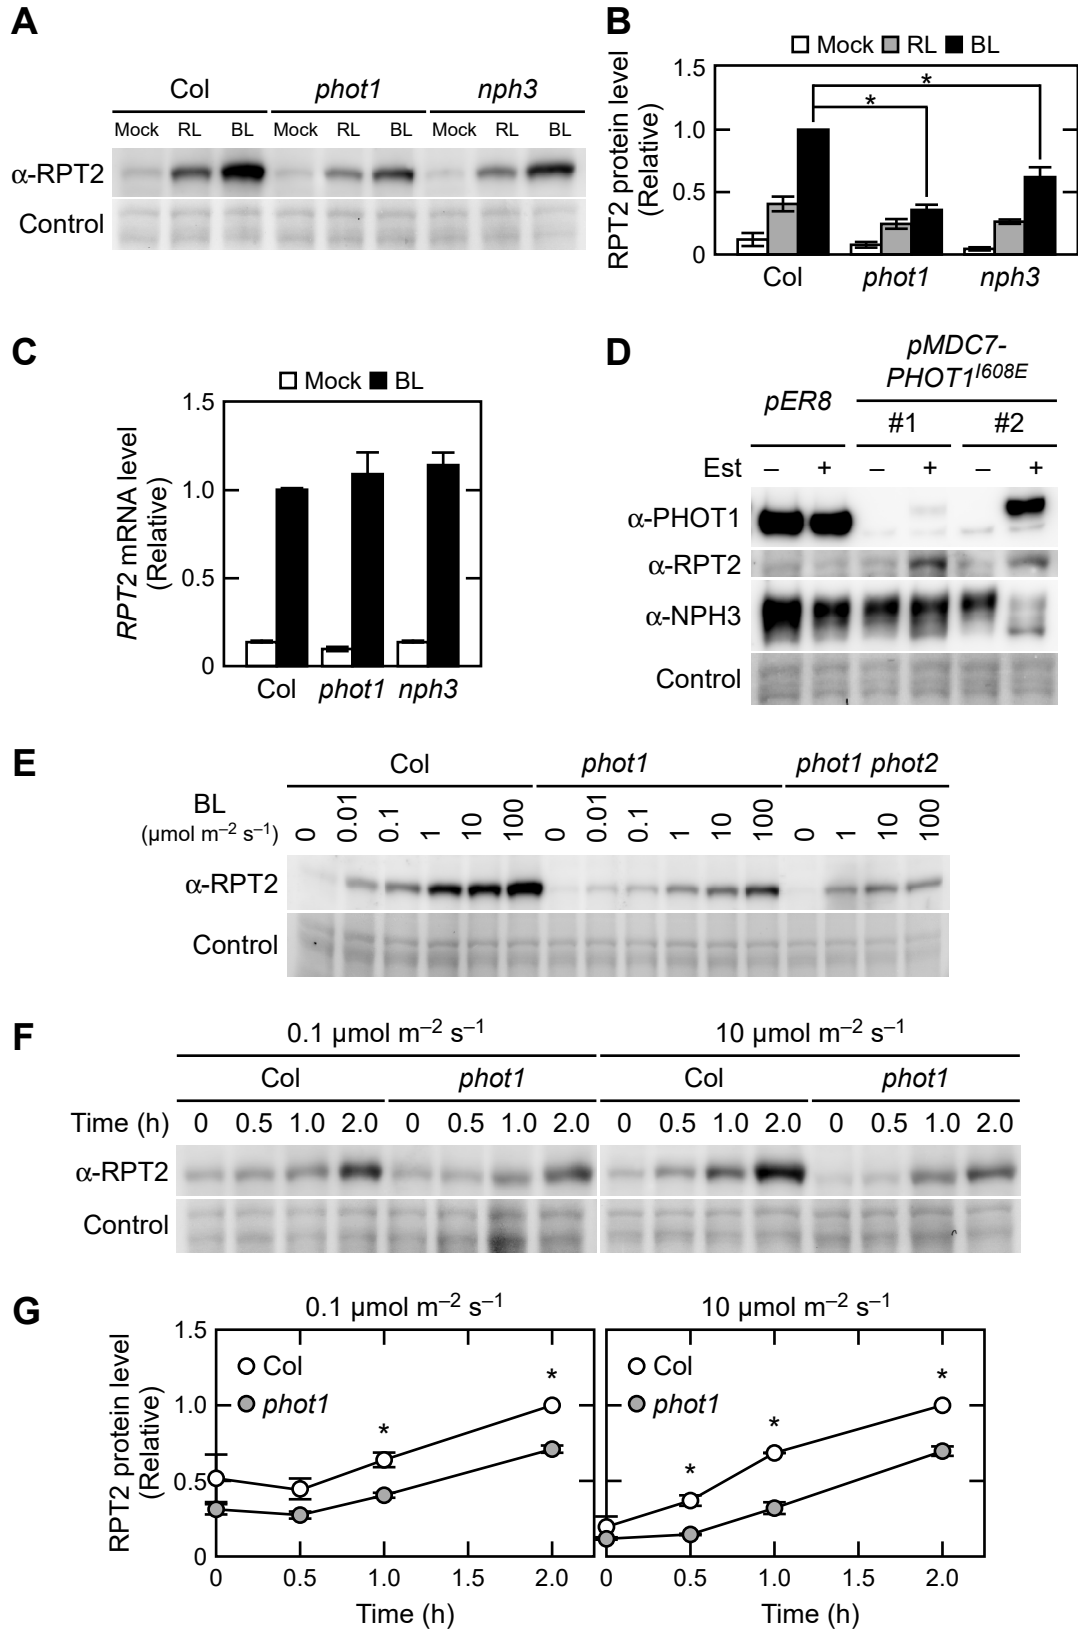

**Figure 6.** Post-transcriptional regulation of RPT2 expression by phototropins.

**(A)** Immunoblotting analysis of RPT2 proteins in wild type (Col), *phot1*, and *nph3* seedlings. Two-day-old etiolated seedlings were mock-irradiated (Mock), or red light- (RL) or blue light- (BL) irradiated at  $10 \mu\text{mol m}^{-2} \text{s}^{-1}$  for 6 h. Total proteins (10  $\mu\text{g}$ ) extracted from the seedlings were resolved on 10% SDS-PAGE gels, followed by immunoblotting with  $\alpha$ -RPT2 antibodies. The protein-blotted membranes were stained as a loading control.

**(B)** Statistical analysis of the data in **(A)**. The values were normalized with a loading control and then calculated against the data from the blue light-irradiated seedlings of wild type. The data shown are the mean values  $\pm$  SE ( $n = 3$ ). Asterisks indicate a statistically significant difference (Student's t test;  $P < 0.05$ ).

**(C)** qRT-PCR analysis of *RPT2* in wild type (Col), *phot1*, and *nph3* seedlings. Two-day-old etiolated seedlings were irradiated with blue light at  $10 \mu\text{mol m}^{-2} \text{s}^{-1}$  for 6 h or mock-irradiated. The values were normalized using an internal control (*18S rRNA*) and the calculated against the values from blue light-irradiated seedlings of wild type. The data represent the means and SE ( $n = 3$ ).

**(D)** Immunoblotting analysis of PHOT1, RPT2 and NPH3 in *phot1* mutants transformed with a *pMDC7-PHOT1<sup>I608E</sup>* construct (*pMDC7-PHOT1<sup>I608E</sup>*: two independent lines, #1 and #2) and the *pER8* vector control line. Two-day-old etiolated seedlings were grown on agar medium with (+) or without (–) 10  $\mu\text{M}$  estradiol (Est). Microsomal proteins (7.5  $\mu\text{g}$ ) extracted from the seedlings were separated on 7.5% SDS-PAGE gels, followed by immunoblotting with  $\alpha$ -PHOT1,  $\alpha$ -RPT2, and anti-NPH3 ( $\alpha$ -NPH3) antibodies. The protein-blotted membranes were stained as a loading control.

**(E)** Fluence-rate dependency of the RPT2 induction in wild type (Col), *phot1*, and *phot1 phot2* double mutants. Two-day-old etiolated seedlings were irradiated with blue light at the indicated fluence rate for 6 h. Other details were as described in **(A)**.

**(F)** Time course analysis of RPT2 induction in wild type (Col) and *phot1* seedlings. Two-day-old etiolated seedlings were irradiated with blue light at 0.1 (left panel) or 10  $\mu\text{mol m}^{-2} \text{s}^{-1}$  (right panel) for the indicated period. Other details were as described in **(A)**.

**(G)** Statistical analysis the data generated in **(F)**. The values were normalized using a loading control and then calculated against the values from wild-type seedlings irradiated for 2 h. The data shown are the mean values  $\pm$  SE ( $n = 3$ ). Asterisks indicate a statistically significant difference (Student's t test;  $P < 0.05$ ).

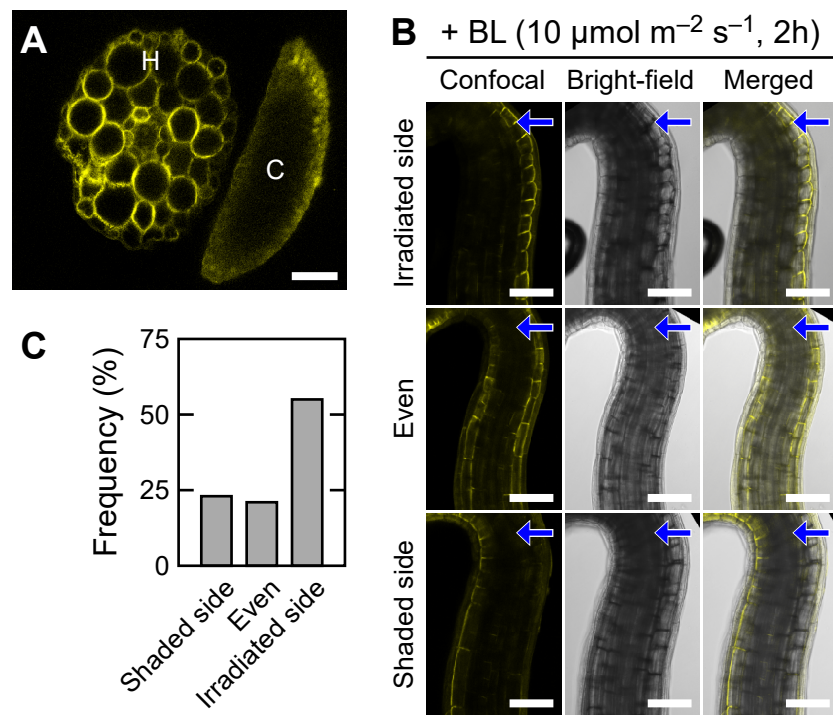

**Figure 7.** Distribution pattern of RPT2-VENUS protein in etiolated hypocotyls.

Two-day-old etiolated seedlings of *rpt2* mutants transformed with a *RPT2pro:RPT2-VENUS* gene were irradiated with blue light (BL) at  $10 \mu\text{mol m}^{-2} \text{s}^{-1}$  for 6 h from above (**A**) or for 2 h from the unilateral side (**B**).

**(A)** A typical distribution pattern of RPT2-VENUS in the hypocotyl cross section. H, hypocotyl; C, cotyledon.

**(B and C)** Distribution patterns of RPT2-VENUS in the upper region of the hypocotyls. Distribution patterns were classified into three types (Irradiated side, Even and Shaded side). Representative confocal (left panel), bright field (mid panel) and merged images (right panel) are shown in **(B)**. Arrows indicate the direction of blue light. The frequencies of each expression pattern were calculated from 74 seedlings and are shown in **(C)**. White bar, 100  $\mu\text{m}$ .

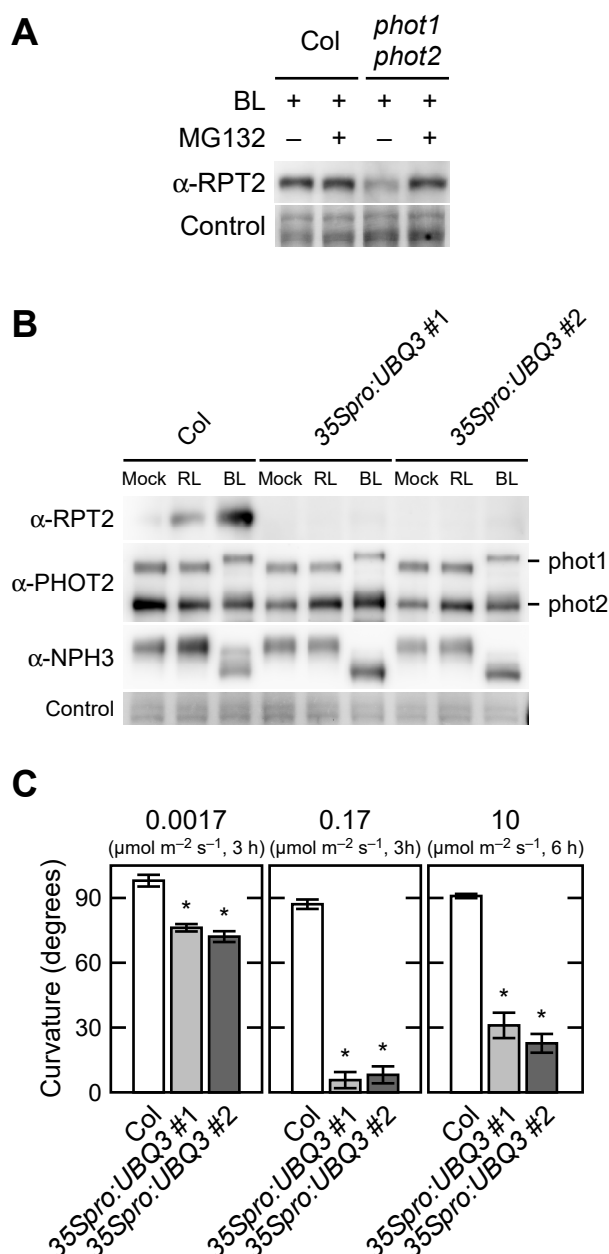

**Figure 8.** Destabilization of the RPT2 protein via a ubiquitin-proteasome dependent pathway. **(A)** Effect of the proteasome inhibitor MG132 on RPT2 protein expression. Two-day-old etiolated seedlings of wild type (Col) and *phot1 phot2* double mutant were transferred into liquid medium with (+) or without (-) 50  $\mu\text{M}$  MG132, kept in the dark for 1 h, and subsequently irradiated with blue light (BL) at 10  $\mu\text{mol m}^{-2} \text{s}^{-1}$  for 3 h (+) or mock-irradiated (-). Total proteins (10  $\mu\text{g}$ ) extracted from the seedlings were separated on 10% SDS-PAGE gels, followed by immunoblotting with  $\alpha$ -RPT2 antibodies. The protein-blotted membranes were stained as a loading control. **(B)** Immunoblotting analysis of RPT2, PHOT1, PHOT2 and NPH3 in wild-type (Col) and wild-type seedlings transformed with *35Spro:UBQ3* (*35Spro:UBQ3*: two independent lines; #1 and #2). Two-day-old etiolated seedlings were mock-, red light- (RL) or blue light- (BL) irradiated at 10  $\mu\text{mol m}^{-2} \text{s}^{-1}$  for 6 h. Total proteins (10  $\mu\text{g}$ ) extracted from the seedlings were then separated on 7.5% SDS-PAGE gels, followed by immunoblotting with  $\alpha$ -RPT2,  $\alpha$ -PHOT2 and  $\alpha$ -NPH3 antibodies. The protein-blotted membranes were stained as a loading control. **(C)** Hypocotyl phototropism in wild-type (Col) and *35Spro:UBQ3* transgenic lines. Two-day-old etiolated seedlings were irradiated with unilateral blue light at 0.0017 or 0.17  $\mu\text{mol m}^{-2} \text{s}^{-1}$  for 3 h, or 10  $\mu\text{mol m}^{-2} \text{s}^{-1}$  for 6 h. The data shown are the mean values  $\pm$  SE for hypocotyl curvatures of 14-24 seedlings. Asterisks indicate a statistically significant difference (Student's t test;  $P < 0.05$ ).

## Parsed Citations

Alonso, J.M., Stepanova, A.N., Leisse, T.J., Kim, C.J., Chen, H., Shinn, P., Stevenson, D.K., Zimmerman, J., Barajas, P., Cheuk, R., Gadrinab, C., Heller, C., Jeske, A., Koesema, E., Meyers, C.C., Parker, H., Prednis, L., Ansari, Y., Choy, N., Deen, H., Geralt, M., Hazari, N., Hom, E., Karnes, M., Mulholland, C., Ndubaku, R., Schmidt, I., Guzman, P., Aguilar-Henonin, L., Schmid, M., Weigel, D., Carter, D.E., Marchand, T., Risseuw, E., Brogden, D., Zeko, A., Crosby, W.L., Berry, C.C., and Ecker, J.R. (2003). Genome-Wide Insertional Mutagenesis of *Arabidopsis thaliana*. *Science* 301: 653-657.

Pubmed: [Author and Title](#)

Google Scholar: [Author Only](#) [Title Only](#) [Author and Title](#)

Ausubel, F.M., Brent, R., Kingston, R.E., Moore, D.D., Seidman, J.G., Smith, J.A., and Struhl, K. (2001). *Current Protocols in Molecular Biology*. New York, NY: John Wiley & Sons.

Pubmed: [Author and Title](#)

Google Scholar: [Author Only](#) [Title Only](#) [Author and Title](#)

Casal, J.J., Candia, A.N., and Sellaro, R. (2014). Light perception and signaling by phytochrome A *Journal of Experimental Botany* 65: 2835-2845.

Pubmed: [Author and Title](#)

Google Scholar: [Author Only](#) [Title Only](#) [Author and Title](#)

Christie, J.M., Reymond, P., Powell, G.K., Bernasconi, P., Raibekas, A.A., Liscum, E., and Briggs, W.R. (1998). *Arabidopsis* NPH1: a flavoprotein with the properties of a photoreceptor for phototropism. *Science* 282: 1698-1701.

Pubmed: [Author and Title](#)

Google Scholar: [Author Only](#) [Title Only](#) [Author and Title](#)

Christie, J.M., Swartz, T.E., Bogomolni, R.A., and Briggs, W.R. (2002). Phototropin LOV domains exhibit distinct roles in regulating photoreceptor function. *The Plant Journal* 32: 205-219.

Pubmed: [Author and Title](#)

Google Scholar: [Author Only](#) [Title Only](#) [Author and Title](#)

Christie, J.M. (2007). Phototropin blue-light receptors. *The Annual Review of Plant Biology* 58: 21-45.

Pubmed: [Author and Title](#)

Google Scholar: [Author Only](#) [Title Only](#) [Author and Title](#)

Clough, R.C., and Vierstra, R.D. (1997). Phytochrome degradation. *Plant, Cell & Environment* 20: 713-721.

Pubmed: [Author and Title](#)

Google Scholar: [Author Only](#) [Title Only](#) [Author and Title](#)

Curtis, M.D., and Grossniklaus, U. (2003). A gateway cloning vector set for high-throughput functional analysis of genes in plants. *Plant Physiol* 133:462-469.

Pubmed: [Author and Title](#)

Google Scholar: [Author Only](#) [Title Only](#) [Author and Title](#)

de Wit, M., Galvão, V.C., and Fankhauser, C. (2016). Light-Mediated Hormonal Regulation of Plant Growth and Development. *Annual Review of Plant Biology* 67: 513-537.

Pubmed: [Author and Title](#)

Google Scholar: [Author Only](#) [Title Only](#) [Author and Title](#)

Genschik, P., Sumara, I., and Lechner, E. (2013). The emerging family of CULLIN3-RING ubiquitin ligases (CRL3s): cellular functions and disease implications. *The EMBO Journal* 32: 2307-2320.

Pubmed: [Author and Title](#)

Google Scholar: [Author Only](#) [Title Only](#) [Author and Title](#)

Haga, K., and Kimura, T. (2019). Physiological Characterization of Phototropism in *Arabidopsis* seedlings. In *Method in Molecular Biology* 1924 Phototropism, Yamamoto, K. T. ed (New York, USA: Human Press), pp. 3-17.

Pubmed: [Author and Title](#)

Google Scholar: [Author Only](#) [Title Only](#) [Author and Title](#)

Haga, K., and Sakai, T. (2012). PIN auxin efflux carriers are necessary for pulse-induced but not continuous light-induced phototropism in *Arabidopsis*. *Plant Physiol.* 160: 763-776.

Pubmed: [Author and Title](#)

Google Scholar: [Author Only](#) [Title Only](#) [Author and Title](#)

Haga, K., Tsuchida-Mayama, T., Yamada, M., and Sakai, T. (2015). *Arabidopsis* ROOT PHOTOTROPISM2 Contributes to the Adaptation to High-Intensity Light in Phototropic Responses. *The Plant Cell.* 27: 1098-1112.

Pubmed: [Author and Title](#)

Google Scholar: [Author Only](#) [Title Only](#) [Author and Title](#)

Harada, A., Takemiya, A., Inoue, S., Sakai, T., and Shimazaki, K. (2013). Role of RPT2 in leaf positioning and flattening and a possible inhibition of phot2 signaling by phot1. *Plant & Cell Physiology* 54: 36-47.

Pubmed: [Author and Title](#)

Google Scholar: [Author Only](#) [Title Only](#) [Author and Title](#)

Harper, S.M., Christie, J.M., and Gardner, K.H. (2004). Disruption of the LOV-J $\alpha$  helix interaction activates phototropin kinase activity.

**Biochemistry 43: 16184-16192.**

Pubmed: [Author and Title](#)

Google Scholar: [Author Only Title Only Author and Title](#)

**Inada, S., Ohgishi, M., Mayama, T., Okada, K., and Sakai, T. (2004). RPT2 is a signal transducer involved in phototropic response and stomatal opening by association with phototropin 1 in Arabidopsis thaliana. The Plant Cell 16: 886-897.**

Pubmed: [Author and Title](#)

Google Scholar: [Author Only Title Only Author and Title](#)

**Kagawa, T., Sakai, T., Suetsugu, N., Oikawa, K., Ishiguro, S., Kato, T., Tabata, S., Okada, K., and Wada, M. (2001). Arabidopsis NPL1: a phototropin homolog controlling the chloroplast high-light avoidance response. Science 291: 2138-2141.**

Pubmed: [Author and Title](#)

Google Scholar: [Author Only Title Only Author and Title](#)

**Kaiserli, E., Sullivan, S., Jones, M.A., Feeney, K.A., and Christie, J.M. (2009). Domain swapping to assess the mechanistic basis of Arabidopsis phototropin 1 receptor kinase activation and endocytosis by blue-light. Plant Cell. 21: 3226-3244.**

Pubmed: [Author and Title](#)

Google Scholar: [Author Only Title Only Author and Title](#)

**Kinoshita, T., Doi, M., Suetsugu, N., Kagawa, T., Wada, M., and Shimazaki, K. (2001). Phot1 and phot2 mediate blue light regulation of stomatal opening. Nature 414: 656-660.**

Pubmed: [Author and Title](#)

Google Scholar: [Author Only Title Only Author and Title](#)

**Kinoshita, E., and Kinoshita-Kikuta, E. (2011). Improved Phos-tag SDS-PAGE under neutral pH conditions for advanced protein phosphorylation profiling. Proteomics 11: 319-323.**

Pubmed: [Author and Title](#)

Google Scholar: [Author Only Title Only Author and Title](#)

**Li, J., Li, G., Wang, H., and Deng, X.Q. (2011). Phytochrome signaling mechanism. The Arabidopsis Book e0148.**

Pubmed: [Author and Title](#)

Google Scholar: [Author Only Title Only Author and Title](#)

**Lin, C., Yang, H., Guo, H., Mockler, T., Chen, J., and Cashmore, A.R. (1998). Enhancement of blue-light sensitivity of Arabidopsis seedlings by a blue light receptor cryptochrome 2. Proceedings of the National Academy of Sciences of the United States of America 95: 2686-2690.**

Pubmed: [Author and Title](#)

Google Scholar: [Author Only Title Only Author and Title](#)

**Liscum, E., and Briggs, W.R. (1995). Mutations in the NPH1 locus of Arabidopsis disrupt the perception of phototropic stimuli. The Plant Cell 7: 473-485.**

Pubmed: [Author and Title](#)

Google Scholar: [Author Only Title Only Author and Title](#)

**Motchoulski, A., and Liscum, E. (1999). Arabidopsis NPH3: ANPH1 photoreceptor-interacting protein essential for phototropism. Science 286: 961-964.**

Pubmed: [Author and Title](#)

Google Scholar: [Author Only Title Only Author and Title](#)

**Nagashima, A., Suzuki, G., Uehara, Y., Saji, K., Furukawa, T., Koshiba, T., Sekimoto, M., Fujioka, S., Kuroha, T., Kojima, M., Sakakibara, H., Fujisawa, N., Okada, K., and Sakai, T. (2008). Phytochromes and cryptochromes regulate the differential growth of Arabidopsis hypocotyls in both a PGP19-dependent and -independent manner. The Plant Journal 53, 516-529.**

Pubmed: [Author and Title](#)

Google Scholar: [Author Only Title Only Author and Title](#)

**Nakasako, M., Iwata, T., Matsuoka, D., and Tokutomi, S. (2004). Light-induced structural changes of LOV domain-containing polypeptides from Arabidopsis phototropin 1 and 2 studied by small-angle X-ray scattering. Biochemistry 43: 14881-14890.**

Pubmed: [Author and Title](#)

Google Scholar: [Author Only Title Only Author and Title](#)

**Ohgishi, M., Saji, K., Okada, K., and Sakai, T. (2004). Functional analysis of each blue-light receptor, cry1, cry2, phot1, and phot2, by using combinatorial multiple mutants in Arabidopsis. Proceedings of the National Academy of Sciences of the United States of America 101: 2223-2228.**

Pubmed: [Author and Title](#)

Google Scholar: [Author Only Title Only Author and Title](#)

**Okajima, K., Kashojiya, S., and Tokutomi, S. (2012). Photosensitivity of kinase activation by blue-light involves the lifetime of a cysteinyl-flavin adduct intermediate, S390, in the photoreaction cycle of the LOV2 domain in phototropin, a plant blue-light receptor. Journal of Biological Chemistry 287: 40972-40981.**

Pubmed: [Author and Title](#)

Google Scholar: [Author Only Title Only Author and Title](#)

**Okajima, K. (2016). Molecular mechanism of phototropin light signaling. Journal of Plant Research 129: 159-166.**

Pubmed: [Author and Title](#)

Google Scholar: [Author Only Title Only Author and Title](#)



---

**Pedmale, U.V., and Liscum, E. (2007).** Regulation of phototropic signaling in Arabidopsis via phosphorylation state changes in the phototropin 1-interacting protein NPH3. *Journal of Biological Chemistry* 282: 19992-20001.

Pubmed: [Author and Title](#)

Google Scholar: [Author Only Title Only Author and Title](#)

**Petersen, J., Inoue, S.I., Kelly, S.M., Sullivan, S., Kinoshita, T., and Christie, J.M. (2017).** Functional characterization of a constitutively active kinase variant of Arabidopsis phototropin 1. *Journal of Biological Chemistry* 292: 13843-13852.

Pubmed: [Author and Title](#)

Google Scholar: [Author Only Title Only Author and Title](#)

**Rademacher, E.H., and Offringa, R. (2012).** Evolutionary Adaptations of Plant AGC Kinases: From Light Signaling to Cell Polarity Regulation. *Frontiers in Plant Science* 3: 250.

Pubmed: [Author and Title](#)

Google Scholar: [Author Only Title Only Author and Title](#)

**Roberts, D., Pedmale, U.V., Morrow, J., Sachdev, S., Lechner, E., Tang, X., Zheng, N., Hannink, M., Genschik, P., and Liscum, E. (2011).** Modulation of phototropic responsiveness in Arabidopsis through ubiquitination of phototropin 1 by the CUL3-Ring E3 ubiquitin ligase CRL3 (NPH3). *The Plant Cell* 23: 3627-3640.

Pubmed: [Author and Title](#)

Google Scholar: [Author Only Title Only Author and Title](#)

**Sakai, T., Wada, T., Ishiguro, S., and Okada, K. (2000).** RPT2. A signal transducer of the phototropic response in Arabidopsis. *The Plant Cell* 12: 225-236.

Pubmed: [Author and Title](#)

Google Scholar: [Author Only Title Only Author and Title](#)

**Sakai, T., Kagawa, T., Kasahara, M., Swartz, T.E., Christie, J.M., Briggs, W.R., Wada, M., and Okada, K. (2001).** Arabidopsis *nph1* and *np1*: blue-light receptors that mediate both phototropism and chloroplast relocation. *Proceedings of the National Academy of Science of America* 98: 6969-6974.

Pubmed: [Author and Title](#)

Google Scholar: [Author Only Title Only Author and Title](#)

**Sakai, T. (2005).** NPH3 and RPT2: signal transducers in phototropin signaling pathways. In *Light Sensing in Plants*, Wada M, Shimazaki K, Iino M eds (Tokyo, Japan: Springer-Verlag), pp. 179-184.

Pubmed: [Author and Title](#)

Google Scholar: [Author Only Title Only Author and Title](#)

**Sakamoto, K., and Briggs, W.R. (2002).** Cellular and subcellular localization of phototropin 1. *The Plant Cell* 14: 1723-1735.

Pubmed: [Author and Title](#)

Google Scholar: [Author Only Title Only Author and Title](#)

**Schindelin, J., Arganda-Carreras, I., Frise, E., Kaynig, V., Longair, M., Pietzsch, T., Preibisch, S., Rueden, C., Saalfeld, S., Schmid, B., et al. (2012)** Fiji: An open-source platform for biological-image analysis. *Nat Methods* 9: 676-68

Pubmed: [Author and Title](#)

Google Scholar: [Author Only Title Only Author and Title](#)

**Sharrock, R.A., and Clack, T. (2002).** Patterns of expression and normalized levels of the five Arabidopsis phytochromes. *Plant Physiology* 130: 442-456.

Pubmed: [Author and Title](#)

Google Scholar: [Author Only Title Only Author and Title](#)

**Sullivan, S., Thomson, C.E., Lamont, D.J., Jones, M.A., and Christie, J.M. (2008).** In vivo phosphorylation site mapping and functional characterization of Arabidopsis phototropin 1. *Molecular Plant* 1: 178-194.

Pubmed: [Author and Title](#)

Google Scholar: [Author Only Title Only Author and Title](#)

**Sullivan, S., Kharshiing, E., Laird, J., Sakai, T., and Christie, J.M. (2019).** Deetiolation Enhances Phototropism by Modulating NON-PHOTOTROPIC HYPOCOTYL3 Phosphorylation Status. *Plant Physiology* 180: 1119-1131.

Pubmed: [Author and Title](#)

Google Scholar: [Author Only Title Only Author and Title](#)

**Suetsugu, N., Takemiya, A., Kong, S.G., Higa, T., Komatsu, A., Shimazaki, K., Kohchi, T., and Wada, M. (2016).** RPT2/NCH1 subfamily of NPH3-like proteins is essential for the chloroplast accumulation response in land plants. *Proceedings of the National Academy of Science of America* 113: 10424-10429.

Pubmed: [Author and Title](#)

Google Scholar: [Author Only Title Only Author and Title](#)

**Suzuki, H., Koshiba, T., Fujita, C., Yamauchi, Y., Kimura, T., Isobe, T., Sakai, T., Taoka, M., and Okamoto, T. (2019).** Low-fluence blue light-induced phosphorylation of Zmphot1 mediates the first positive phototropism. *Journal of Experimental Botany* in press.

Pubmed: [Author and Title](#)

Google Scholar: [Author Only Title Only Author and Title](#)

**Tsuchida-Mayama, T., Nakano, M., Uehara, Y., Sano, M., Fujisawa, N., Okada, K., and Sakai, T. (2008).** Mapping of the phosphorylation

sites on the phototropic signal transducer, NPH3. *Plant Science* 174: 626-633.

Pubmed: [Author and Title](#)

Google Scholar: [Author Only](#) [Title Only](#) [Author and Title](#)

Tsuchida-Mayama, T., Sakai, T., Hanada, A., Uehara, Y., Asami, T., and Yamaguchi, S. (2010). Role of the phytochrome and cryptochrome signaling pathways in hypocotyl phototropism. *The Plant Journal* 62: 653-662.

Pubmed: [Author and Title](#)

Google Scholar: [Author Only](#) [Title Only](#) [Author and Title](#)

Xue, Y., Xing, J., Wan, Y., Lv, X., Fan, L., Zhang, Y., Song, K., Wang, L., Wang, X., Deng, X., Baluška, F., Christie, J.M., and Lin, J. (2018). Arabidopsis Blue-light Receptor Phototropin 1 Undergoes Blue-light-Induced Activation in Membrane Microdomains. *Molecular Plant* 11: 846-859.

Pubmed: [Author and Title](#)

Google Scholar: [Author Only](#) [Title Only](#) [Author and Title](#)

Zuo, J., Niu, Q.W., and Chua, N.H. (2000). An estrogen receptor-based transactivator XVE mediates highly inducible gene expression in transgenic plants. *The Plant Journal* 24: 265-273.

Pubmed: [Author and Title](#)

Google Scholar: [Author Only](#) [Title Only](#) [Author and Title](#)
